# Supplementary material for: Finite Element Model Updating of Steel Arch Bridge Based on First-Order Mode Test Data
Source: Hindawi journal article supplement (doi:10.1155/2023/9326195), 2023-04-15
Supplement: f1 [file 9326195.f1.zip]

Archive with 5 entries (5 files):
- aStiffnessMatrice2truss.txt
- bMassMatrice2.txt
- data (1).txt
- updating (1).txt
- wuxian.txt
