# Supplementary material for: Finite Element Model Updating of Steel Arch Bridge Based on First-Order Mode Test Data
Source: Hindawi journal article supplement (doi:10.1155/2023/9326195), 2023-04-15
Supplement: f1 [file 9326195.f1.zip › aStiffnessMatrice2truss.txt]

close all
clear
clc
%%%%%%材料参数
E=2e11;%材料弹性模量

A=2*0.384*0.004+2*(0.25*0.004+2*0.0029*0.004+2*0.03*0.004);%下部梁截面面积
I=(2*1/12*0.004*0.384^3)+2*((1/12*0.25*0.004^3+0.198^2*0.25*0.004)+2*(1/12*0.004*0.037^3+0.1775^2*0.004*0.037)+2*(1/12*0.03*0.004^3+0.157^2*0.03*0.004));%下部梁惯性矩


D1=273e-3;%上部梁外径
d1=261e-3;%上部梁内径
A1=pi*(D1^2-d1^2)/4;%上部拱截面积
I1=pi*(D1^4-d1^4)/64;%上部拱截面惯性矩

D2=108e-3;%杆外径
d2=101e-3;%杆内径
A2=pi*(D2^2-d2^2)/4;%杆截面积
I2=pi*(D2^4-d2^4)/64;%吊杆截面惯性矩

%%%节点坐标
xy=[0	0	;... %节点1
    2.5	0	;...
    5	0	;...
    9	0	;...
    13 0	;...%节点4
    17  0	;...%节点5
    21	0	;...%节点6
    25	0	;...
    29	0	;...
    33	0	;...
    37	0	;...%节点10
    39.5 0  ;...
    42	0	;...%节点11
    5   3.5	;...%节点12
    9	5.3	;...
    13	6.4	;...
    17	7.3	;...%节点15
    21	7.5	;...%节点16
    25	7.3	;...
    29	6.4	;...
    33	5.3	;...%节点19
    37	3.5	...%节点20
    ];


% xy=[0	0	;... %节点1
%     5.5	0	;...
%     9.5	0	;...
%     13.5	0	;...%节点4
%     17.5	0	;...%节点5
%     21.5	0	;...%节点6
%     25.5	0	;...
%     29.5	0	;...
%     33.5	0	;...
%     37.5	0	;...%节点10
%     43	   0	;...%节点11
%     5.5	   3.5	;...%节点12
%     9.5	   5.3	;...
%     13.5	6.4	;...
%     17.5	7.3	;...%节点15
%     21.5	7.5	;...%节点16
%     25.5	7.3	;...
%     29.5	6.4	;...
%     33.5	5.3	;...%节点19
%     37.5	3.5	...%节点20
%     ];

%%%%节点编号
nodNb=[1	2	;...%单元1
    2	3	;...
    3	4	;...
    4	5	;...
    5	6	;...%单元5
    6	7	;...
    7	8	;...
    8	9	;...
    9	10	;...
    10	11	;...%单元10
    11	12	;...%单元11
    12	13	;...
    1	14	;...
    14	15	;...
    15	16	;...%单元15
    16	17	;...
    17	18	;...
    18	19	;...
    19	20	;...%单元19
    20  21  ;...
    21	22	;...%单元20
    22  13;...
    3	14	;...
    4	15	;...
    5	16	;...%单元24
    6	17	;...%单元25
    7	18	;...
    8	19	;...
    9	20	;...
    10	21	;...
    11	22	;...
    ];

%%%关联表
link_tab=[nodNb(:,1)*3-2 nodNb(:,1)*3-1 nodNb(:,1)*3-0 nodNb(:,2)*3-2 nodNb(:,2)*3-1 nodNb(:,2)*3-0];
num_node=length(xy);%节点数20
% num_e=length(nodNb);%节点数20
trans=zeros(num_node*3);%节点数*3

%%%%下部单元刚度矩阵
for i=1:12
    noden=nodNb(i,:);
    xy1=xy(noden(1),:);
    xy2=xy(noden(2),:);
    L=sqrt((xy2(1)-xy1(1))^2+(xy2(2)-xy1(2))^2);
    c=(xy2(1)-xy1(1))/L;
    s=(xy2(2)-xy1(2))/L;
    S=[c s 0 0 0 0;
        -s c 0 0 0 0;
        0 0 1 0 0 0;
        0 0 0 c s 0;
        0 0 0 -s c 0;
        0 0 0 0 0 1];
    ke=[E*A/L 0 0 -E*A/L 0 0;
        0 12*E*I/(L)^3   6*E*I/(L)^2   0 -12*E*I/(L)^3  6*E*I/(L)^2;
        0  6*E*I/(L)^2   4*E*I/(L)     0  -6*E*I/(L)^2   2*E*I/(L);
        -E*A/L 0 0 E*A/L 0 0;
        0 -12*E*I/(L)^3  -6*E*I/(L)^2  0  12*E*I/(L)^3  -6*E*I/(L)^2;
        0 6*E*I/(L)^2   2*E*I/(L)      0 -6*E*I/(L)^2   4*E*I/(L)];
    kg=S.'*ke*S;
    
    trans(link_tab(i,:),link_tab(i,:),i)=kg;
    model.k(i).stiff=trans(:,:,i);
    
    
end


%%%%上部拱单元刚度矩阵
for i=13:22
    noden=nodNb(i,:);
    xy1=xy(noden(1),:);
    xy2=xy(noden(2),:);
    L=sqrt((xy2(1)-xy1(1))^2+(xy2(2)-xy1(2))^2);
    c=(xy2(1)-xy1(1))/L;
    s=(xy2(2)-xy1(2))/L;
    S=[c s 0 0 0 0;
        -s c 0 0 0 0;
        0 0 1 0 0 0;
        0 0 0 c s 0;
        0 0 0 -s c 0;
        0 0 0 0 0 1];
    ke=[E*A1/L 0 0 -E*A1/L 0 0;
        0 12*E*I1/(L)^3   6*E*I1/(L)^2   0 -12*E*I1/(L)^3  6*E*I1/(L)^2;
        0  6*E*I1/(L)^2   4*E*I1/(L)     0  -6*E*I1/(L)^2   2*E*I1/(L);
        -E*A1/L 0 0 E*A1/L 0 0;
        0 -12*E*I1/(L)^3  -6*E*I1/(L)^2  0  12*E*I1/(L)^3  -6*E*I1/(L)^2;
        0 6*E*I1/(L)^2   2*E*I1/(L)      0 -6*E*I1/(L)^2   4*E*I1/(L)];
    kg=round(S.'*ke*S,4);
    trans(link_tab(i,:),link_tab(i,:),i)=kg;
    model.k(i).stiff=trans(:,:,i);
end

%%%%吊杆单元刚度矩阵
for i=23:31
    noden=nodNb(i,:);
    xy1=xy(noden(1),:);
    xy2=xy(noden(2),:);
    L=sqrt((xy2(1)-xy1(1))^2+(xy2(2)-xy1(2))^2);
    c=(xy2(1)-xy1(1))/L;
    s=(xy2(2)-xy1(2))/L;
    S=[c s 0 0 0 0;
        -s c 0 0 0 0;
        0 0 1 0 0 0;
        0 0 0 c s 0;
        0 0 0 -s c 0;
        0 0 0 0 0 1];

    ke=[E*A2/L 0 0 -E*A2/L 0 0;
        0  0  0   0  0  0;
        0  0  0   0  0  0;
        -E*A2/L 0 0 E*A2/L 0 0;
        0  0  0   0  0  0;
        0  0  0   0  0  0;];

    kg=S.'*ke*S;
     
    trans(link_tab(i,:),link_tab(i,:),i)=kg;
    model.k(i).stiff=trans(:,:,i);
    
end


%2.5m单元套管
[lin col]=size(nodNb);
linktable1=[nodNb(:,1)*3-2 nodNb(:,1)*3-1 nodNb(:,1)*3 ...
           nodNb(:,2)*3-2 nodNb(:,2)*3-1 nodNb(:,2)*3];       
T=zeros(6,66,31);
for i=1:12
        for j=1:1:6
            T(j,linktable1(i,j),i)=1;
        end
end

L11=2.5;%%钢外套长度
A11=0.29*0.012*2+0.008*0.4*2;%钢外套截面面积
I11=(1/12*0.29*0.012^3+0.008*0.290*0.206^2)*2+(1/12*0.008*0.4^3)*2;%钢外套截面惯性矩,上下两片+左右两片
ke1=[E*A11/L11 0 0 -E*A11/L11 0 0;
        0 12*E*I11/(L11)^3   6*E*I11/(L11)^2   0 -12*E*I11/(L11)^3  6*E*I11/(L11)^2;
        0  6*E*I11/(L11)^2   4*E*I11/(L11)     0  -6*E*I11/(L11)^2   2*E*I11/(L11);
        -E*A11/L11 0 0 E*A11/L11 0 0;
        0 -12*E*I11/(L11)^3  -6*E*I11/(L11)^2  0  12*E*I11/(L11)^3  -6*E*I11/(L11)^2;
        0 6*E*I11/(L11)^2   2*E*I11/(L11)      0 -6*E*I11/(L11)^2   4*E*I11/(L11)];
kg1=T(:,:,1).'*ke1*T(:,:,1);
kg12=T(:,:,12).'*ke1*T(:,:,12);
kgg=kg1+kg12;


Ck1=2.2;%下部梁中间部分刚度附加系数
for i=2:11
   model.k(i).stiff=Ck1*model.k(i).stiff;
end
k0=kgg+zeros(66);
for i=1:31
    k0=k0+model.k(i).stiff;
end
