# Supplementary material for: Finite Element Model Updating of Steel Arch Bridge Based on First-Order Mode Test Data
Source: Hindawi journal article supplement (doi:10.1155/2023/9326195), 2023-04-15
Supplement: f1 [file 9326195.f1.zip › bMassMatrice2.txt]

close all
clear
clc

%%%%%%材料参数

rho=7.85e3;%密度
Abm0=0.29*0.012*2+0.008*0.4*2;%钢外套截面面积
Abm2=2*0.384*0.004+2*(0.25*0.004+2*0.0029*0.004+2*0.03*0.004);%下部梁截面面积
Abm1=Abm0+Abm2;

D1=273e-3;%上部梁外径
d1=261e-3;%上部梁内径
A1=pi*(D1^2-d1^2)/4;%上部拱截面积

D2=108e-3;%杆外径
d2=101e-3;%杆内径
A2=pi*(D2^2-d2^2)/4;%杆截面积

%%%%节点坐标
%%%节点坐标
xy=[0	0	;... %节点1
    2.5	0	;...
    5	0	;...
    9	0	;...
    13 0	;...%节点4
    17  0	;...%节点5
    21	0	;...%节点6
    25	0	;...
    29	0	;...
    33	0	;...
    37	0	;...%节点10
    39.5 0  ;...
    42	0	;...%节点11
    5   3.5	;...%节点12
    9	5.3	;...
    13	6.4	;...
    17	7.3	;...%节点15
    21	7.5	;...%节点16
    25	7.3	;...
    29	6.4	;...
    33	5.3	;...%节点19
    37	3.5	...%节点20
    ];


% xy=[0	0	;... %节点1
%     5.5	0	;...
%     9.5	0	;...
%     13.5	0	;...%节点4
%     17.5	0	;...%节点5
%     21.5	0	;...%节点6
%     25.5	0	;...
%     29.5	0	;...
%     33.5	0	;...
%     37.5	0	;...%节点10
%     43	0	;...%节点11
%     5.5	3.5	;...%节点12
%     9.5	5.3	;...
%     13.5	6.4	;...
%     17.5	7.3	;...%节点15
%     21.5	7.5	;...%节点16
%     25.5	7.3	;...
%     29.5	6.4	;...
%     33.5	5.3	;...%节点19
%     37.5	3.5	...%节点20
%     ];

%%%%节点编号
nodNb=[1	2	;...%单元1
    2	3	;...
    3	4	;...
    4	5	;...
    5	6	;...%单元5
    6	7	;...
    7	8	;...
    8	9	;...
    9	10	;...
    10	11	;...%单元10
    11	12	;...%单元11
    12	13	;...
    1	14	;...
    14	15	;...
    15	16	;...%单元15
    16	17	;...
    17	18	;...
    18	19	;...
    19	20	;...%单元19
    20  21  ;...
    21	22	;...%单元20
    22  13;...
    3	14	;...
    4	15	;...
    5	16	;...%单元24
    6	17	;...%单元25
    7	18	;...
    8	19	;...
    9	20	;...
    10	21	;...
    11	22	;...
    ];
%%%关联表
link_tab=[nodNb(:,1)*3-2 nodNb(:,1)*3-1 nodNb(:,1)*3-0 nodNb(:,2)*3-2 nodNb(:,2)*3-1 nodNb(:,2)*3-0];
num_node=length(xy);%节点数20
% num_e=length(nodNb); %节点数20
trans=zeros(num_node*3);%节点数*3

%%%下部梁单元质量矩阵
 m=132.1;%附加质量（电缆、栏杆等）（每米重量）
 M=43.96;%梁（每米重量）
 C0=m/M;%附加质量系数
 C1=1+C0;%质量修正系数
for i=1:12
    noden=nodNb(i,:);
    xy1=xy(noden(1),:);
    xy2=xy(noden(2),:);
    L=sqrt((xy2(1)-xy1(1))^2+(xy2(2)-xy1(2))^2);
    c=(xy2(1)-xy1(1))/L;
    s=(xy2(2)-xy1(2))/L;
    S=[c s 0 0 0 0;
        -s c 0 0 0 0;
        0 0 1 0 0 0;
        0 0 0 c s 0;
        0 0 0 -s c 0;
        0 0 0 0 0 1];
    if i==1 || i==12 %2.5m下部梁两端部
       Me=rho*Abm1*L/420*[140 0 0 70 0 0;
           0 156  22*L 0 54 -13*L;
           0 22*L 4*L^2 0 13*L -3*L^2; 
           70 0 0 140 0 0;
           0 54 13*L 0 156 -22*L
           0 -13*L -3*L^2 0 -22*L 4*L^2];
   else
     Me=rho*Abm2*L/420*[140 0 0 70 0 0;%下部梁中部
           0 156*C1  22*L 0 54 -13*L;
           0 22*L 4*L^2 0 13*L -3*L^2; 
           70 0 0 140 0 0;
           0 54 13*L 0 156*C1 -22*L
           0 -13*L -3*L^2 0 -22*L 4*L^2];
    end
    Mg=S.'*Me*S
    
    trans(link_tab(i,:),link_tab(i,:),i)=Mg;
    model.m(i).mass=trans(:,:,i)
    
    
end

 %%上部拱单元质量矩阵
for i=13:22
    noden=nodNb(i,:);
    xy1=xy(noden(1),:);
    xy2=xy(noden(2),:);
    L=sqrt((xy2(1)-xy1(1))^2+(xy2(2)-xy1(2))^2);
    c=(xy2(1)-xy1(1))/L;
    s=(xy2(2)-xy1(2))/L;
    S=[c s 0 0 0 0;
        -s c 0 0 0 0;
        0 0 1 0 0 0;
        0 0 0 c s 0;
        0 0 0 -s c 0;
        0 0 0 0 0 1];
    Me=rho*A1*L/420*[140 0 0 70 0 0;
           0 156 22*L 0 54 -13*L;
           0 22*L 4*L^2 0 13*L -3*L^2; 
           70 0 0 140 0 0;
           0 54 13*L 0 156 -22*L
           0 -13*L -3*L^2 0 -22*L 4*L^2];
    Mg=round(S.'*Me*S,4);%消除质量矩阵与其转置矩阵相减的计算精度误差
    
    trans(link_tab(i,:),link_tab(i,:),i)=Mg;
    model.m(i).mass=trans(:,:,i);
    
end


%%吊杆质量矩阵
for i=23:31
    noden=nodNb(i,:);
    xy1=xy(noden(1),:);
    xy2=xy(noden(2),:);
    L=sqrt((xy2(1)-xy1(1))^2+(xy2(2)-xy1(2))^2);
    c=(xy2(1)-xy1(1))/L;
    s=(xy2(2)-xy1(2))/L;
    S=[c s 0 0 0 0;
        -s c 0 0 0 0;
        0 0 1 0 0 0;
        0 0 0 c s 0;
        0 0 0 -s c 0;
        0 0 0 0 0 1];
   Me=rho*A2*L/420*[140 0 0 70 0 0;
           0 156 22*L 0 54 -13*L;
           0 22*L 4*L^2 0 13*L -3*L^2; 
           70 0 0 140 0 0;
           0 54 13*L 0 156 -22*L
           0 -13*L -3*L^2 0 -22*L 4*L^2];
    Mg=S.'*Me*S;
    
    trans(link_tab(i,:),link_tab(i,:),i)=Mg;
    model.m(i).mass=trans(:,:,i);
    
end

%%%上部拱质量集成
m0=zeros(66);
for i=1:31
   m0=m0+model.m(i).mass;
end

save m0
