# Supplementary material for: Finite Element Model Updating of Steel Arch Bridge Based on First-Order Mode Test Data
Source: Hindawi journal article supplement (doi:10.1155/2023/9326195), 2023-04-15
Supplement: f1 [file 9326195.f1.zip › data (1).txt]

time[s]	AI1-01 [mm/s]	AI2-01 [mm/s]	AI3-01 [mm/s]	AI4-01 [mm/s]	AI6-01 [mm/s]
0	-0.065	-0.226	-0.406	-0.297	-0.021
0.01	-0.013	0.022	0.191	0.412	0.554
0.02	-0.033	-0.07	-0.019	0.203	0.421
0.03	-0.095	-0.178	-0.221	-0.033	0.238
0.04	-0.145	-0.304	-0.418	-0.266	0.038
0.05	-0.173	-0.419	-0.614	-0.487	-0.159
0.06	-0.179	-0.491	-0.825	-0.691	-0.324
0.07	-0.17	-0.545	-1.003	-0.865	-0.447
0.08	-0.157	-0.584	-1.111	-1.005	-0.557
0.09	-0.174	-0.584	-1.156	-1.096	-0.606
0.1	-0.152	-0.562	-1.138	-1.104	-0.602
0.11	-0.114	-0.498	-1.064	-1.027	-0.554
0.12	-0.094	-0.416	-0.911	-0.888	-0.445
0.13	-0.076	-0.335	-0.722	-0.687	-0.312
0.14	-0.069	-0.261	-0.513	-0.435	-0.157
0.15	-0.075	-0.186	-0.269	-0.173	0.006
0.16	-0.076	-0.109	-0.036	0.098	0.187
0.17	-0.05	-0.008	0.183	0.35	0.342
0.18	-0.02	0.097	0.383	0.547	0.453
0.19	0.013	0.196	0.571	0.697	0.52
0.2	0.051	0.295	0.722	0.794	0.547
0.21	0.091	0.392	0.83	0.838	0.525
0.22	0.138	0.478	0.917	0.835	0.48
0.23	0.167	0.552	0.959	0.808	0.393
0.24	0.197	0.594	0.979	0.768	0.262
0.25	0.211	0.605	0.975	0.69	0.101
0.26	0.204	0.595	0.93	0.568	-0.078
0.27	0.193	0.561	0.851	0.403	-0.251
0.28	0.197	0.511	0.705	0.214	-0.398
0.29	0.197	0.449	0.482	0.002	-0.495
0.3	0.19	0.34	0.24	-0.193	-0.552
0.31	0.161	0.198	-0.009	-0.36	-0.557
0.32	0.107	0.033	-0.251	-0.491	-0.519
0.33	0.022	-0.134	-0.463	-0.576	-0.422
0.34	-0.057	-0.3	-0.612	-0.59	-0.301
0.35	-0.133	-0.436	-0.732	-0.559	-0.143
0.36	-0.207	-0.56	-0.821	-0.496	0.018
0.37	-0.263	-0.662	-0.868	-0.414	0.176
0.38	-0.301	-0.724	-0.895	-0.347	0.305
0.39	-0.327	-0.74	-0.901	-0.31	0.421
0.4	-0.325	-0.725	-0.875	-0.282	0.492
0.41	-0.305	-0.677	-0.843	-0.253	0.517
0.42	-0.273	-0.611	-0.77	-0.217	0.489
0.43	-0.228	-0.525	-0.663	-0.176	0.421
0.44	-0.186	-0.414	-0.505	-0.13	0.315
0.45	-0.144	-0.271	-0.312	-0.085	0.17
0.46	-0.081	-0.109	-0.096	-0.038	0.014
0.47	0.007	0.076	0.112	0.014	-0.133
0.48	0.092	0.254	0.314	0.071	-0.279
0.49	0.176	0.416	0.508	0.109	-0.394
0.5	0.249	0.572	0.673	0.144	-0.455
0.51	0.3	0.697	0.801	0.188	-0.475
0.52	0.343	0.774	0.907	0.249	-0.45
0.53	0.358	0.794	0.955	0.326	-0.387
0.54	0.333	0.762	0.975	0.422	-0.31
0.55	0.288	0.68	0.976	0.509	-0.211
0.56	0.235	0.593	0.927	0.56	-0.083
0.57	0.172	0.5	0.84	0.579	0.051
0.58	0.129	0.387	0.71	0.566	0.178
0.59	0.084	0.259	0.528	0.513	0.275
0.6	0.019	0.115	0.324	0.416	0.329
0.61	-0.043	-0.04	0.103	0.277	0.356
0.62	-0.086	-0.177	-0.129	0.112	0.351
0.63	-0.136	-0.298	-0.359	-0.06	0.319
0.64	-0.18	-0.422	-0.562	-0.228	0.256
0.65	-0.214	-0.541	-0.747	-0.373	0.176
0.66	-0.25	-0.632	-0.902	-0.491	0.078
0.67	-0.276	-0.697	-0.996	-0.599	-0.013
0.68	-0.276	-0.708	-1.046	-0.695	-0.098
0.69	-0.255	-0.668	-1.055	-0.765	-0.172
0.7	-0.215	-0.601	-1.018	-0.797	-0.232
0.71	-0.161	-0.509	-0.938	-0.788	-0.275
0.72	-0.104	-0.405	-0.815	-0.733	-0.308
0.73	-0.062	-0.295	-0.663	-0.63	-0.31
0.74	-0.026	-0.191	-0.475	-0.486	-0.292
0.75	-0.014	-0.097	-0.265	-0.315	-0.255
0.76	-0.002	-0.012	-0.047	-0.122	-0.205
0.77	0.032	0.09	0.169	0.077	-0.145
0.78	0.074	0.223	0.382	0.26	-0.077
0.79	0.123	0.36	0.601	0.415	0.01
0.8	0.175	0.488	0.788	0.552	0.091
0.81	0.205	0.589	0.936	0.668	0.169
0.82	0.218	0.643	1.045	0.766	0.239
0.83	0.22	0.654	1.092	0.846	0.293
0.84	0.214	0.641	1.102	0.894	0.326
0.85	0.19	0.597	1.058	0.878	0.333
0.86	0.154	0.533	0.97	0.801	0.287
0.87	0.123	0.446	0.84	0.669	0.195
0.88	0.095	0.346	0.65	0.484	0.07
0.89	0.083	0.245	0.419	0.26	-0.063
0.9	0.063	0.146	0.175	0.012	-0.177
0.91	0.047	0.037	-0.079	-0.226	-0.257
0.92	0.015	-0.081	-0.33	-0.427	-0.301
0.93	-0.031	-0.219	-0.555	-0.583	-0.315
0.94	-0.089	-0.37	-0.738	-0.673	-0.298
0.95	-0.147	-0.493	-0.872	-0.698	-0.254
0.96	-0.194	-0.584	-0.956	-0.688	-0.187
0.97	-0.234	-0.655	-0.997	-0.655	-0.099
0.98	-0.264	-0.695	-0.998	-0.61	-0.007
0.99	-0.276	-0.695	-0.975	-0.555	0.079
1	-0.255	-0.668	-0.928	-0.491	0.156
1.01	-0.228	-0.601	-0.851	-0.409	0.22
1.02	-0.191	-0.501	-0.719	-0.321	0.267
1.03	-0.161	-0.388	-0.545	-0.215	0.303
1.04	-0.129	-0.267	-0.34	-0.077	0.294
1.05	-0.094	-0.144	-0.116	0.067	0.253
1.06	-0.05	-0.017	0.106	0.204	0.193
1.07	-0.002	0.122	0.317	0.314	0.115
1.08	0.056	0.261	0.496	0.379	0.018
1.09	0.12	0.39	0.647	0.407	-0.067
1.1	0.174	0.511	0.761	0.415	-0.152
1.11	0.23	0.618	0.853	0.405	-0.22
1.12	0.296	0.7	0.918	0.401	-0.263
1.13	0.325	0.753	0.947	0.418	-0.269
1.14	0.325	0.757	0.958	0.43	-0.257
1.15	0.295	0.69	0.936	0.438	-0.225
1.16	0.233	0.591	0.861	0.435	-0.183
1.17	0.161	0.468	0.738	0.4	-0.132
1.18	0.126	0.335	0.56	0.34	-0.077
1.19	0.094	0.206	0.344	0.243	-0.015
1.2	0.047	0.075	0.109	0.111	0.041
1.21	-0.008	-0.075	-0.111	-0.026	0.088
1.22	-0.077	-0.224	-0.319	-0.154	0.133
1.23	-0.15	-0.37	-0.514	-0.252	0.176
1.24	-0.199	-0.51	-0.686	-0.3	0.228
1.25	-0.241	-0.618	-0.825	-0.328	0.268
1.26	-0.29	-0.695	-0.903	-0.364	0.284
1.27	-0.313	-0.739	-0.928	-0.398	0.262
1.28	-0.308	-0.718	-0.931	-0.448	0.194
1.29	-0.279	-0.647	-0.903	-0.512	0.101
1.3	-0.219	-0.555	-0.852	-0.558	0.009
1.31	-0.16	-0.448	-0.784	-0.584	-0.085
1.32	-0.11	-0.346	-0.69	-0.579	-0.174
1.33	-0.063	-0.26	-0.556	-0.519	-0.254
1.34	-0.033	-0.153	-0.377	-0.423	-0.302
1.35	-0.005	-0.028	-0.17	-0.292	-0.322
1.36	0.052	0.089	0.046	-0.126	-0.304
1.37	0.095	0.215	0.261	0.042	-0.263
1.38	0.126	0.344	0.472	0.203	-0.205
1.39	0.168	0.449	0.67	0.353	-0.133
1.4	0.209	0.552	0.821	0.474	-0.052
1.41	0.236	0.64	0.933	0.573	0.035
1.42	0.254	0.667	1.003	0.665	0.123
1.43	0.235	0.642	1.017	0.731	0.199
1.44	0.184	0.578	0.981	0.76	0.258
1.45	0.137	0.471	0.891	0.763	0.298
1.46	0.095	0.354	0.753	0.706	0.3
1.47	0.05	0.253	0.582	0.584	0.271
1.48	0.028	0.146	0.393	0.427	0.211
1.49	0.011	0.059	0.196	0.236	0.121
1.5	-0.002	-0.003	0.017	0.023	0.012
1.51	-0.008	-0.066	-0.15	-0.167	-0.078
1.52	-0.017	-0.124	-0.314	-0.334	-0.14
1.53	-0.05	-0.192	-0.467	-0.455	-0.157
1.54	-0.086	-0.304	-0.601	-0.523	-0.143
1.55	-0.133	-0.427	-0.734	-0.56	-0.119
1.56	-0.191	-0.53	-0.844	-0.577	-0.106
1.57	-0.233	-0.619	-0.903	-0.58	-0.098
1.58	-0.253	-0.656	-0.923	-0.597	-0.095
1.59	-0.25	-0.617	-0.915	-0.611	-0.08
1.6	-0.199	-0.549	-0.871	-0.586	-0.067
1.61	-0.139	-0.459	-0.78	-0.535	-0.05
1.62	-0.111	-0.351	-0.635	-0.449	-0.026
1.63	-0.084	-0.252	-0.442	-0.312	-0.001
1.64	-0.064	-0.148	-0.225	-0.143	0.034
1.65	-0.052	-0.031	0.001	0.042	0.085
1.66	-0.023	0.072	0.227	0.246	0.145
1.67	0.026	0.17	0.424	0.424	0.19
1.68	0.057	0.285	0.59	0.543	0.208
1.69	0.099	0.378	0.725	0.616	0.202
1.7	0.147	0.461	0.815	0.636	0.175
1.71	0.18	0.539	0.857	0.619	0.134
1.72	0.206	0.574	0.874	0.586	0.075
1.73	0.231	0.58	0.86	0.535	0.003
1.74	0.228	0.587	0.827	0.471	-0.063
1.75	0.22	0.553	0.775	0.405	-0.125
1.76	0.191	0.488	0.677	0.324	-0.18
1.77	0.158	0.403	0.554	0.217	-0.228
1.78	0.116	0.286	0.39	0.109	-0.263
1.79	0.09	0.15	0.188	-0.011	-0.282
1.8	0.05	0.041	-0.029	-0.148	-0.267
1.81	0.007	-0.076	-0.23	-0.269	-0.2
1.82	-0.039	-0.212	-0.414	-0.353	-0.101
1.83	-0.092	-0.327	-0.577	-0.388	0.002
1.84	-0.148	-0.447	-0.697	-0.389	0.112
1.85	-0.205	-0.557	-0.778	-0.363	0.206
1.86	-0.257	-0.622	-0.8	-0.331	0.279
1.87	-0.293	-0.651	-0.805	-0.308	0.32
1.88	-0.306	-0.656	-0.787	-0.293	0.323
1.89	-0.288	-0.61	-0.743	-0.293	0.279
1.9	-0.238	-0.521	-0.681	-0.297	0.199
1.91	-0.167	-0.422	-0.606	-0.314	0.115
1.92	-0.11	-0.297	-0.494	-0.317	0.021
1.93	-0.071	-0.183	-0.361	-0.295	-0.052
1.94	-0.031	-0.085	-0.216	-0.228	-0.115
1.95	0.011	0.011	-0.053	-0.124	-0.157
1.96	0.053	0.116	0.121	0.005	-0.186
1.97	0.101	0.226	0.318	0.137	-0.206
1.98	0.139	0.359	0.526	0.24	-0.207
1.99	0.176	0.484	0.694	0.321	-0.196
2	0.221	0.574	0.811	0.398	-0.163
2.01	0.255	0.63	0.88	0.463	-0.122
2.02	0.261	0.642	0.887	0.494	-0.063
2.03	0.252	0.602	0.853	0.516	-0.013
2.04	0.21	0.534	0.803	0.52	0.038
2.05	0.149	0.438	0.71	0.51	0.087
2.06	0.095	0.316	0.597	0.475	0.131
2.07	0.053	0.206	0.465	0.425	0.146
2.08	0.014	0.105	0.308	0.332	0.159
2.09	-0.018	0.014	0.138	0.211	0.16
2.1	-0.035	-0.067	-0.032	0.081	0.152
2.11	-0.059	-0.154	-0.203	-0.057	0.133
2.12	-0.089	-0.241	-0.35	-0.188	0.114
2.13	-0.122	-0.321	-0.481	-0.295	0.086
2.14	-0.141	-0.383	-0.602	-0.375	0.069
2.15	-0.164	-0.448	-0.696	-0.426	0.052
2.16	-0.198	-0.503	-0.766	-0.463	0.025
2.17	-0.221	-0.553	-0.806	-0.502	-0.015
2.18	-0.228	-0.568	-0.82	-0.532	-0.053
2.19	-0.216	-0.537	-0.808	-0.546	-0.1
2.2	-0.173	-0.47	-0.753	-0.546	-0.141
2.21	-0.12	-0.374	-0.646	-0.518	-0.163
2.22	-0.065	-0.252	-0.514	-0.452	-0.177
2.23	-0.015	-0.125	-0.343	-0.35	-0.172
2.24	0.03	-0.003	-0.143	-0.215	-0.16
2.25	0.047	0.105	0.063	-0.056	-0.136
2.26	0.058	0.184	0.272	0.12	-0.092
2.27	0.065	0.244	0.441	0.295	-0.041
2.28	0.075	0.297	0.575	0.433	0.02
2.29	0.095	0.363	0.686	0.521	0.099
2.3	0.132	0.429	0.744	0.582	0.163
2.31	0.166	0.484	0.77	0.604	0.2
2.32	0.179	0.502	0.79	0.593	0.208
2.33	0.179	0.489	0.784	0.575	0.181
2.34	0.161	0.455	0.737	0.541	0.146
2.35	0.146	0.403	0.67	0.481	0.109
2.36	0.131	0.348	0.577	0.41	0.073
2.37	0.098	0.275	0.447	0.315	0.024
2.38	0.07	0.186	0.306	0.185	-0.044
2.39	0.038	0.085	0.129	0.033	-0.112
2.4	0	-0.017	-0.07	-0.138	-0.16
2.41	-0.026	-0.122	-0.27	-0.308	-0.191
2.42	-0.056	-0.23	-0.473	-0.449	-0.177
2.43	-0.102	-0.335	-0.647	-0.55	-0.166
2.44	-0.141	-0.433	-0.774	-0.583	-0.124
2.45	-0.16	-0.515	-0.856	-0.583	-0.081
2.46	-0.199	-0.564	-0.883	-0.56	-0.047
2.47	-0.229	-0.584	-0.841	-0.515	-0.002
2.48	-0.249	-0.574	-0.777	-0.445	0.044
2.49	-0.24	-0.532	-0.69	-0.378	0.077
2.5	-0.202	-0.453	-0.597	-0.305	0.118
2.51	-0.14	-0.353	-0.506	-0.209	0.148
2.52	-0.093	-0.254	-0.374	-0.138	0.16
2.53	-0.074	-0.153	-0.208	-0.077	0.154
2.54	-0.049	-0.053	-0.042	0.016	0.137
2.55	-0.007	0.047	0.112	0.133	0.129
2.56	0.033	0.141	0.266	0.25	0.119
2.57	0.084	0.234	0.414	0.383	0.101
2.58	0.113	0.324	0.582	0.463	0.069
2.59	0.142	0.434	0.733	0.487	0.02
2.6	0.174	0.539	0.834	0.489	-0.007
2.61	0.224	0.608	0.878	0.477	-0.046
2.62	0.246	0.629	0.849	0.455	-0.055
2.63	0.249	0.586	0.764	0.427	-0.113
2.64	0.221	0.496	0.684	0.362	-0.168
2.65	0.173	0.405	0.572	0.254	-0.191
2.66	0.101	0.298	0.41	0.148	-0.208
2.67	0.065	0.174	0.253	0.032	-0.22
2.68	0.027	0.074	0.095	-0.079	-0.174
2.69	0.003	-0.011	-0.116	-0.144	-0.14
2.7	-0.003	-0.117	-0.282	-0.209	-0.072
2.71	-0.046	-0.243	-0.414	-0.294	-0.031
2.72	-0.159	-0.354	-0.533	-0.376	0.027
2.73	-0.229	-0.465	-0.624	-0.435	0.076
2.74	-0.231	-0.534	-0.734	-0.431	0.14
2.75	-0.201	-0.574	-0.851	-0.375	0.206
2.76	-0.214	-0.609	-0.846	-0.319	0.231
2.77	-0.254	-0.618	-0.757	-0.305	0.229
2.78	-0.305	-0.574	-0.653	-0.299	0.222
2.79	-0.272	-0.499	-0.565	-0.256	0.206
2.8	-0.154	-0.387	-0.471	-0.168	0.192
2.81	-0.062	-0.269	-0.385	-0.093	0.16
2.82	-0.041	-0.138	-0.22	-0.06	0.109
2.83	-0.024	-0.003	0.001	-0.03	0.05
2.84	0.022	0.154	0.196	0.035	-0.011
2.85	0.112	0.299	0.363	0.119	-0.092
2.86	0.185	0.412	0.521	0.222	-0.171
2.87	0.212	0.485	0.642	0.287	-0.245
2.88	0.204	0.523	0.731	0.298	-0.29
2.89	0.206	0.558	0.763	0.283	-0.307
2.9	0.221	0.576	0.751	0.274	-0.291
2.91	0.237	0.572	0.71	0.256	-0.298
2.92	0.252	0.539	0.657	0.241	-0.285
2.93	0.252	0.49	0.595	0.224	-0.276
2.94	0.193	0.427	0.522	0.185	-0.216
2.95	0.125	0.335	0.434	0.135	-0.128
2.96	0.06	0.199	0.285	0.116	-0.016
2.97	0.014	0.032	0.093	0.107	0.073
2.98	-0.046	-0.139	-0.102	0.087	0.147
2.99	-0.11	-0.283	-0.283	0.019	0.185
3	-0.169	-0.386	-0.414	-0.094	0.223
3.01	-0.209	-0.45	-0.533	-0.2	0.254
3.02	-0.218	-0.509	-0.658	-0.295	0.275
3.03	-0.217	-0.551	-0.763	-0.362	0.256
3.04	-0.214	-0.583	-0.846	-0.394	0.238
3.05	-0.221	-0.601	-0.874	-0.419	0.189
3.06	-0.215	-0.584	-0.843	-0.437	0.135
3.07	-0.203	-0.521	-0.749	-0.431	0.035
3.08	-0.182	-0.426	-0.609	-0.426	-0.081
3.09	-0.142	-0.294	-0.451	-0.393	-0.205
3.1	-0.046	-0.146	-0.292	-0.327	-0.289
3.11	0.041	0.007	-0.152	-0.272	-0.323
3.12	0.094	0.131	-0.003	-0.216	-0.321
3.13	0.101	0.218	0.155	-0.136	-0.322
3.14	0.115	0.277	0.28	-0.03	-0.305
3.15	0.13	0.328	0.401	0.107	-0.237
3.16	0.175	0.382	0.521	0.266	-0.136
3.17	0.2	0.444	0.635	0.414	-0.016
3.18	0.199	0.487	0.746	0.544	0.076
3.19	0.157	0.5	0.854	0.63	0.138
3.2	0.13	0.483	0.911	0.687	0.188
3.21	0.143	0.461	0.864	0.707	0.215
3.22	0.152	0.427	0.777	0.668	0.253
3.23	0.131	0.366	0.663	0.568	0.261
3.24	0.087	0.277	0.502	0.456	0.252
3.25	0.041	0.163	0.333	0.315	0.22
3.26	-0.008	0.043	0.136	0.18	0.162
3.27	-0.039	-0.085	-0.06	0.055	0.098
3.28	-0.078	-0.212	-0.244	-0.08	0.027
3.29	-0.122	-0.308	-0.414	-0.245	-0.052
3.3	-0.145	-0.375	-0.553	-0.392	-0.13
3.31	-0.151	-0.405	-0.651	-0.555	-0.191
3.32	-0.119	-0.388	-0.757	-0.688	-0.243
3.33	-0.077	-0.363	-0.844	-0.767	-0.276
3.34	-0.069	-0.37	-0.867	-0.814	-0.312
3.35	-0.093	-0.399	-0.84	-0.782	-0.334
3.36	-0.135	-0.431	-0.797	-0.724	-0.305
3.37	-0.18	-0.454	-0.743	-0.591	-0.244
3.38	-0.184	-0.455	-0.659	-0.481	-0.161
3.39	-0.179	-0.416	-0.571	-0.327	-0.061
3.4	-0.135	-0.332	-0.419	-0.207	0.025
3.41	-0.077	-0.214	-0.267	-0.048	0.101
3.42	-0.014	-0.064	-0.051	0.082	0.16
3.43	0.02	0.083	0.182	0.245	0.23
3.44	0.044	0.215	0.407	0.406	0.28
3.45	0.068	0.301	0.622	0.58	0.335
3.46	0.091	0.372	0.78	0.75	0.367
3.47	0.119	0.426	0.895	0.876	0.415
3.48	0.134	0.478	0.961	0.923	0.407
3.49	0.133	0.509	1.015	0.877	0.354
3.5	0.149	0.538	1.008	0.795	0.244
3.51	0.191	0.565	0.948	0.66	0.132
3.52	0.248	0.591	0.823	0.521	-0.001
3.53	0.273	0.57	0.703	0.351	-0.106
3.54	0.243	0.507	0.559	0.195	-0.219
3.55	0.171	0.39	0.428	0.032	-0.316
3.56	0.106	0.24	0.241	-0.094	-0.389
3.57	0.056	0.083	0.028	-0.211	-0.422
3.58	0.02	-0.056	-0.198	-0.31	-0.41
3.59	-0.033	-0.188	-0.404	-0.42	-0.363
3.6	-0.081	-0.309	-0.574	-0.519	-0.307
3.61	-0.14	-0.407	-0.72	-0.63	-0.238
3.62	-0.171	-0.482	-0.856	-0.711	-0.143
3.63	-0.171	-0.544	-0.962	-0.704	-0.057
3.64	-0.181	-0.606	-1.025	-0.627	0.063
3.65	-0.23	-0.665	-1.004	-0.537	0.191
3.66	-0.291	-0.697	-0.937	-0.418	0.296
3.67	-0.336	-0.69	-0.81	-0.303	0.359
3.68	-0.321	-0.634	-0.693	-0.209	0.398
3.69	-0.252	-0.526	-0.599	-0.128	0.369
3.7	-0.164	-0.399	-0.487	-0.085	0.281
3.71	-0.105	-0.26	-0.331	-0.094	0.163
3.72	-0.051	-0.105	-0.169	-0.133	0.021
3.73	0.002	0.053	-0.014	-0.144	-0.1
3.74	0.091	0.203	0.136	-0.106	-0.197
3.75	0.162	0.326	0.27	-0.016	-0.282
3.76	0.215	0.415	0.405	0.075	-0.376
3.77	0.212	0.463	0.576	0.168	-0.449
3.78	0.19	0.511	0.733	0.245	-0.493
3.79	0.176	0.552	0.838	0.29	-0.468
3.8	0.211	0.593	0.866	0.339	-0.381
3.81	0.24	0.607	0.83	0.412	-0.233
3.82	0.264	0.584	0.773	0.47	-0.086
3.83	0.233	0.518	0.725	0.514	0.067
3.84	0.159	0.412	0.673	0.537	0.189
3.85	0.053	0.28	0.613	0.55	0.317
3.86	-0.028	0.133	0.502	0.57	0.427
3.87	-0.075	-0.006	0.344	0.592	0.536
3.88	-0.105	-0.138	0.156	0.555	0.608
3.89	-0.133	-0.24	-0.018	0.465	0.641
3.9	-0.17	-0.311	-0.166	0.296	0.614
3.91	-0.198	-0.355	-0.295	0.092	0.509
3.92	-0.187	-0.386	-0.424	-0.084	0.357
3.93	-0.161	-0.403	-0.552	-0.221	0.196
3.94	-0.143	-0.422	-0.618	-0.331	0.05
3.95	-0.149	-0.422	-0.647	-0.416	-0.082
3.96	-0.171	-0.415	-0.646	-0.485	-0.188
3.97	-0.173	-0.383	-0.599	-0.526	-0.273
3.98	-0.139	-0.336	-0.549	-0.498	-0.33
3.99	-0.073	-0.263	-0.474	-0.442	-0.347
4	-0.016	-0.152	-0.35	-0.369	-0.343
4.01	0.035	-0.014	-0.183	-0.316	-0.298
4.02	0.076	0.128	-0.015	-0.249	-0.231
4.03	0.124	0.253	0.146	-0.152	-0.164
4.04	0.154	0.327	0.253	-0.016	-0.113
4.05	0.161	0.336	0.347	0.117	-0.089
4.06	0.139	0.301	0.418	0.222	-0.084
4.07	0.09	0.271	0.468	0.288	-0.07
4.08	0.056	0.249	0.488	0.297	-0.041
4.09	0.056	0.261	0.473	0.291	0.004
4.1	0.103	0.275	0.427	0.284	0.052
4.11	0.131	0.278	0.354	0.269	0.075
4.12	0.133	0.254	0.312	0.226	0.072
4.13	0.077	0.201	0.271	0.17	0.05
4.14	0.011	0.114	0.216	0.112	0.027
4.15	-0.033	0.016	0.119	0.075	0.043
4.16	-0.044	-0.078	-0.022	0.067	0.08
4.17	-0.065	-0.162	-0.156	0.045	0.109
4.18	-0.087	-0.227	-0.249	-0.014	0.119
4.19	-0.116	-0.265	-0.307	-0.091	0.108
4.2	-0.131	-0.28	-0.344	-0.168	0.082
4.21	-0.119	-0.271	-0.374	-0.227	0.075
4.22	-0.092	-0.256	-0.401	-0.247	0.067
4.23	-0.062	-0.241	-0.404	-0.22	0.067
4.24	-0.056	-0.227	-0.368	-0.168	0.075
4.25	-0.071	-0.207	-0.29	-0.102	0.09
4.26	-0.1	-0.18	-0.175	-0.018	0.099
4.27	-0.101	-0.152	-0.049	0.086	0.11
4.28	-0.08	-0.103	0.063	0.219	0.13
4.29	-0.044	-0.029	0.18	0.336	0.173
4.3	0	0.07	0.315	0.431	0.246
4.31	0.041	0.192	0.443	0.517	0.319
4.32	0.076	0.3	0.605	0.65	0.409
4.33	0.098	0.377	0.807	0.854	0.511
4.34	0.099	0.428	1.022	1.143	0.625
4.35	0.078	0.463	1.269	1.422	0.76
4.36	0.046	0.509	1.48	1.596	0.89
4.37	0.048	0.583	1.574	1.644	0.976
4.38	0.104	0.67	1.531	1.537	0.988
4.39	0.2	0.721	1.39	1.302	0.904
4.4	0.294	0.747	1.109	0.805	0.643
4.41	0.352	0.742	0.683	0.159	0.193
4.42	0.402	0.68	0.177	-0.673	-0.41
4.43	0.399	0.512	-0.436	-1.502	-1.117
4.44	0.379	0.267	-1.101	-2.308	-1.874
4.45	0.307	-0.075	-1.756	-2.997	-2.563
4.46	0.157	-0.462	-2.296	-3.444	-3.132
4.47	-0.011	-0.816	-2.696	-4.08	-3.48
4.48	-0.178	-1.017	-3.468	-5.412	-3.979
4.49	-0.053	-1.138	-4.457	-5.895	-4.538
4.5	0.137	-1.527	-5.052	-6.033	-4.542
4.51	-0.203	-2.072	-5.184	-5.829	-4.058
4.52	-0.57	-2.328	-5.34	-5.461	-3.396
4.53	-0.897	-2.704	-5.036	-4.787	-2.461
4.54	-1.144	-2.807	-4.709	-4.339	-1.635
4.55	-1.186	-2.918	-4.499	-3.107	-0.608
4.56	-1.017	-2.755	-3.975	-1.608	0.525
4.57	-0.912	-2.714	-2.937	-0.265	1.68
4.58	-1.174	-2.257	-1.647	1.532	2.77
4.59	-1.247	-1.722	0.327	3.584	4.129
4.6	-1.148	-0.951	2.23	5.612	5.468
4.61	-0.912	-0.02	4.24	7.606	6.569
4.62	-0.535	0.894	5.987	9.417	7.45
4.63	-0.053	1.914	7.625	10.772	8.03
4.64	0.315	3.096	8.971	11.571	8.297
4.65	0.74	4.047	10.235	11.731	7.948
4.66	1.05	5.025	11.239	11.489	7.098
4.67	1.711	5.891	11.487	10.64	5.822
4.68	2.174	6.438	11.199	9.446	4.107
4.69	2.639	6.875	10.6	7.818	2.021
4.7	2.803	6.877	9.589	5.585	-0.29
4.71	2.744	6.478	8.401	2.947	-2.885
4.72	2.597	5.825	6.469	0.686	-5.165
4.73	2.481	4.968	4.241	-1.545	-6.916
4.74	2.226	3.744	2.131	-3.852	-8.114
4.75	1.743	2.379	-0.494	-5.623	-8.73
4.76	1.127	0.757	-2.853	-7.054	-8.336
4.77	0.312	-1.064	-5.056	-8.15	-7.584
4.78	-0.533	-2.87	-7.312	-8.614	-6.117
4.79	-1.354	-4.676	-9.303	-8.536	-3.952
4.8	-2.078	-6.436	-10.722	-8.009	-1.906
4.81	-2.746	-7.79	-11.729	-7.105	0.343
4.82	-3.481	-8.754	-12.209	-6.154	2.722
4.83	-3.832	-9.161	-12.058	-5.024	4.472
4.84	-3.941	-9.13	-11.431	-3.94	5.815
4.85	-3.929	-8.71	-10.521	-2.84	6.866
4.86	-3.523	-7.901	-9.238	-1.695	6.899
4.87	-3.103	-6.836	-7.663	-0.873	6.309
4.88	-2.593	-5.318	-5.687	-0.616	5.456
4.89	-1.899	-3.537	-3.773	-0.275	3.996
4.9	-0.937	-1.57	-1.708	0.049	2.104
4.91	0.158	0.448	0.749	-0.064	0.52
4.92	0.923	3.112	1.53	-7.383	-3.201
4.93	2.9	5.891	-2.405	-13.268	-10.686
4.94	6.329	6.925	-4.665	-13.46	-14.494
4.95	6.401	5.093	-4.16	-10.386	-14.494
4.96	3.309	2.978	1.987	-5.049	-14.494
4.97	0.013	2.903	6.471	-1.858	-13.399
4.98	-2.221	4.001	10.291	2.43	-9.706
4.99	0.058	5.143	11.219	0.157	-7.358
5	2.144	6.027	6.859	3.977	-3.164
5.01	5.36	5.985	4.876	4.035	0.916
5.02	4.333	4.143	2.34	6.033	5.504
5.03	1.478	2.376	4.035	4.791	9.133
5.04	-2.031	0.372	3.714	8.472	12.866
5.05	-3.174	-0.855	5.2	10.437	-14.494
5.06	-3.212	-3.825	5.461	-13.46	-14.494
5.07	-3.072	-5.531	5.681	-13.46	-14.494
5.08	-4.304	-6.167	5.803	-13.46	-14.494
5.09	-4.358	-4.068	5.87	-13.46	-14.494
5.1	-3.967	-2.339	6.329	12.085	12.893
5.11	-2.015	0.863	5.562	5.468	7.506
5.12	1.878	2.842	2.239	-1.353	3.949
5.13	5.071	5.627	-3.025	-4.61	-1.569
5.14	5.454	4.509	-4.281	-8.274	-4.729
5.15	2.708	2.794	-4.813	-9.781	-10.09
5.16	-0.837	-0.862	-1.824	-10.681	-12.75
5.17	-2.429	-2.298	-3.163	-8.343	-14.494
5.18	-1.679	-2.869	-2.569	-7.467	-14.494
5.19	1.373	-0.653	-3.811	-6.793	-14.494
5.2	2.271	1.767	-3.441	-8.62	-13.653
5.21	3.2	3.678	-2.143	-10.333	-10.801
5.22	2.176	4.296	-1.458	-10.731	-9.13
5.23	3.284	4.162	-1.512	-9.538	-4.484
5.24	2.22	2.659	-3.546	-5.37	0.401
5.25	1.512	-0.79	-3.678	-0.049	5.319
5.26	-1.593	-4.546	-2.751	4.978	7.972
5.27	-5.114	-8.481	-1.847	8.802	10.55
5.28	-6.609	-9.214	-0.367	9.582	12.489
5.29	-6.675	-8.191	-0.724	11.221	-14.494
5.3	-3.89	-5.621	0.635	9.616	-14.494
5.31	-1.661	-3.075	-0.54	8.419	11.991
5.32	0.639	-0.483	0.445	5.078	8.439
5.33	1.234	2.658	1.394	0.319	5.76
5.34	1.517	4.595	1.486	-2.489	2.25
5.35	2.093	4.332	1.463	-3.828	-1.351
5.36	1.229	2.724	0.656	-2.711	-5.909
5.37	1.063	0.241	0.315	-2.401	-9.86
5.38	-0.571	-0.945	0.131	-2.977	-11.701
5.39	-0.076	-0.131	0.384	-3.283	-12.372
5.4	-0.098	1.535	0.205	-6.16	-12.457
5.41	2.095	3.429	0.602	-7.666	-12.618
5.42	3.874	5.67	0.628	-7.821	-10.457
5.43	5.577	7.664	0.931	-6.325	-7.511
5.44	5.335	7.013	1.682	-4.254	-3.116
5.45	3.186	4.609	2.91	-0.371	-0.778
5.46	-0.252	1.157	4.108	3.368	3.648
5.47	-3.235	-2.308	3.738	7.07	6.293
5.48	-4.245	-5.016	2.804	10.929	9.509
5.49	-4.221	-6.075	0.823	11.564	11.23
5.5	-2.629	-5.606	-0.08	9.926	12.571
5.51	-2.696	-4.409	-1.606	7.108	12.701
5.52	-2.107	-2.961	-1.574	4.081	11.445
5.53	-1.423	-1.994	-1.791	0.824	8.575
5.54	-0.044	0.048	-2.601	-0.811	5.511
5.55	1.327	0.792	-2.475	-1.718	2.544
5.56	0.565	0.799	-2.216	-2.267	-0.677
5.57	-0.144	-0.918	-1.278	-3.427	-3.626
5.58	-2.178	-2.176	-1.731	-3.539	-7.159
5.59	-2.113	-3.123	-1.917	-4.592	-10.095
5.6	-1.72	-2.746	-3.73	-6.234	-11.835
5.61	0.906	-0.343	-4.488	-8.31	-12.06
5.62	3.678	2.336	-4.649	-10.076	-11.023
5.63	4.134	4.635	-4.135	-10.694	-9.461
5.64	3.823	4.974	-1.62	-10.223	-7.472
5.65	1.828	4.027	0.157	-6.034	-5.264
5.66	1.524	2.301	2.036	-0.833	-1.557
5.67	-0.107	0.179	2.548	5.13	2
5.68	-1.192	-1.438	4.331	9.383	5.345
5.69	-2.855	-2.714	5.447	11.309	8.268
5.7	-3.491	-2.31	5.883	11.15	10.123
5.71	-2.422	-1.539	4.652	9.809	11.479
5.72	-0.642	0.108	3.367	8.559	11.323
5.73	1.126	1.306	1.87	6.413	10.357
5.74	1.337	2.082	1.573	4.238	8.619
5.75	1.086	2.138	1.764	2.614	6.375
5.76	-0.598	1.096	2.064	1.508	3.262
5.77	-0.694	0.138	2.405	0.965	0.354
5.78	-1.125	-0.382	1.234	0.871	-2.834
5.79	-0.302	-0.995	0.358	-0.081	-5.632
5.8	-0.473	-1.008	-1.026	-2.307	-7.843
5.81	0.008	-0.29	-2.073	-5.695	-9.671
5.82	1.093	1.252	-3.205	-9.578	-10.669
5.83	2.284	2.485	-4.287	-11.955	-10.878
5.84	3.425	2.711	-5.421	-12.141	-9.89
5.85	3.328	1.964	-6.285	-10.168	-7.944
5.86	2.03	0.149	-5.039	-7.101	-5.348
5.87	-0.963	-2.036	-3.329	-3.234	-2.131
5.88	-2.648	-3.69	-1.283	0.504	0.674
5.89	-3.517	-4.814	-0.042	4.012	3.572
5.9	-2.975	-4.573	0.149	6.405	6.386
5.91	-2.005	-3.726	0.079	6.843	8.7
5.92	-1.002	-1.918	0.036	6.575	9.884
5.93	-0.642	-0.641	0.673	5.302	10.258
5.94	-0.43	0.249	1.137	3.846	9.759
5.95	-0.351	0.682	1.582	3.365	8.554
5.96	0.168	0.537	1.3	3.804	6.392
5.97	-0.169	0.021	1.618	4.429	4.375
5.98	-0.595	-0.504	2.142	4.21	1.384
5.99	-1.127	-0.228	3.015	2.998	-1.189
6	-1.148	0.533	3.939	0.98	-4.272
6.01	0.134	2.309	3.493	-1.195	-6.563
6.02	2.247	3.96	2.549	-3.357	-8.189
6.03	3.985	5.395	1.139	-5.2	-9.167
6.04	4.487	5.992	0.2	-6.984	-9.591
6.05	3.736	5.388	0.243	-8.07	-9.235
6.06	2.539	4.052	-0.05	-7.005	-8.281
6.07	1.359	1.638	-0.586	-4.644	-5.94
6.08	0.276	-0.701	-0.99	-1.124	-3.211
6.09	-1	-2.917	-1.208	1.949	-0.63
6.1	-2.337	-3.995	-0.419	3.881	1.818
6.11	-2.627	-3.59	0.139	3.919	4.06
6.12	-2.041	-2.413	0.467	3.269	6.456
6.13	-0.737	-1.028	-0.57	2.978	8.727
6.14	0.239	-0.745	-1.906	2.917	10.096
6.15	0.147	-1.479	-2.48	3.175	10.366
6.16	-1.4	-2.853	-2.558	3.435	9.052
6.17	-2.886	-3.989	-1.743	3.117	7.062
6.18	-3.556	-4.509	-1.32	2.578	4.578
6.19	-2.968	-4.06	-1.559	1.893	2.334
6.2	-1.698	-3.221	-1.924	0.863	-0.129
6.21	-0.466	-1.573	-2.029	-1.295	-2.697
6.22	0.387	0.116	-1.636	-3.839	-5.458
6.23	1.242	2.24	-0.963	-6.357	-7.92
6.24	2.393	4.064	-0.251	-8.051	-9.093
6.25	3.445	5.406	-0.041	-8.276	-9.495
6.26	3.932	5.205	0.174	-6.817	-8.671
6.27	3.455	3.989	0.613	-4.412	-7.766
6.28	1.485	2.158	1.599	-1.756	-6.025
6.29	-0.41	0.228	2.247	0.776	-4.19
6.3	-1.369	-0.925	2.67	2.806	-1.685
6.31	-0.999	-0.968	2.457	4.321	1.239
6.32	-0.113	-0.157	2.408	4.958	4.008
6.33	0.725	0.958	2.699	4.978	6.143
6.34	1.109	2.133	3.206	4.743	7.694
6.35	0.845	2.488	3.374	4.467	8.529
6.36	-0.002	1.571	3.254	5.102	8.995
6.37	-0.736	-0.068	2.422	6.058	8.441
6.38	-1.738	-2.182	1.424	6.398	7.333
6.39	-2.41	-3.662	0.446	5.59	5.32
6.4	-2.795	-3.857	-0.413	3.584	2.68
6.41	-2.264	-3.179	-1.481	0.482	-0.092
6.42	-1.37	-1.768	-2.658	-2.671	-2.656
6.43	0.324	-0.353	-3.723	-5.755	-4.575
6.44	1.822	0.958	-4.394	-7.895	-6.331
6.45	2.481	1.694	-4.42	-9.013	-7.667
6.46	2.14	1.793	-3.98	-9.301	-8.161
6.47	1.222	1.243	-3.138	-8.428	-8.211
6.48	0.386	0.029	-2.599	-6.359	-7.228
6.49	-0.325	-1.26	-2.224	-3.487	-5.715
6.5	-0.578	-2.177	-1.894	-1.09	-3.866
6.51	-0.686	-2.285	-1.32	0.517	-1.733
6.52	-0.88	-1.725	-0.351	0.971	0.178
6.53	-0.71	-0.587	0.227	1.193	2.558
6.54	0.102	0.544	0.513	1.706	4.788
6.55	0.96	1.132	0.865	2.884	6.792
6.56	1.05	1.276	1.675	4.398	8.09
6.57	0.228	0.811	2.871	5.979	8.228
6.58	-0.984	0.094	4.052	7.247	7.474
6.59	-1.902	-0.683	4.926	7.811	6.194
6.6	-2.115	-0.814	4.891	7.427	4.581
6.61	-1.422	-0.286	3.958	5.744	2.814
6.62	-0.111	0.723	2.811	3.342	0.643
6.63	0.931	1.842	1.58	0.273	-1.427
6.64	1.668	2.913	0.766	-2.671	-3.367
6.65	2.023	3.274	0.09	-4.778	-4.804
6.66	2.204	3.32	-0.688	-5.682	-5.906
6.67	2.145	2.494	-0.979	-5.54	-6.573
6.68	1.691	1.55	-1.198	-4.641	-7.268
6.69	0.637	0.319	-0.769	-3.874	-7.229
6.7	-0.484	-0.702	-0.854	-3.28	-6.287
6.71	-0.863	-1.422	-1.25	-2.574	-4.652
6.72	-0.599	-1.855	-2.197	-2.064	-2.456
6.73	-0.169	-1.682	-3.014	-1.595	-0.442
6.74	0.174	-1.548	-3.354	-1.498	1.772
6.75	-0.044	-1.301	-3.198	-1.072	3.508
6.76	-0.291	-1.412	-2.617	-0.258	5.292
6.77	-0.923	-1.832	-2.139	1.299	6.797
6.78	-1.633	-2.74	-1.624	3.082	7.543
6.79	-2.449	-3.684	-0.952	4.683	7.067
6.8	-2.913	-4.263	-0.183	5.504	5.701
6.81	-2.905	-3.814	0.275	4.882	4.08
6.82	-2.078	-2.317	0.585	3.04	2.821
6.83	-0.621	-0.148	0.506	0.642	1.485
6.84	0.979	1.909	0.464	-1.211	0.096
6.85	1.937	3.274	0.371	-2.381	-1.801
6.86	2.291	3.582	0.659	-2.881	-3.674
6.87	1.959	3.201	1.3	-2.91	-5.092
6.88	1.326	2.615	1.96	-2.467	-5.88
6.89	0.978	2.159	2.228	-1.696	-6.097
6.9	0.908	1.882	2.263	-0.889	-6.083
6.91	0.923	1.71	2.369	-0.299	-5.65
6.92	0.874	1.816	2.401	-0.084	-4.768
6.93	1.062	1.954	2.196	-0.295	-3.326
6.94	1.448	2.093	1.814	-0.298	-1.199
6.95	1.541	2.252	1.322	-0.023	0.979
6.96	1.443	1.922	0.972	0.753	3.116
6.97	0.692	1.03	0.739	2.1	4.63
6.98	-0.449	-0.606	0.585	3.595	5.653
6.99	-1.729	-2.319	0.403	4.754	6.264
7	-2.632	-3.743	0.161	5.191	6.112
7.01	-3.031	-4.35	-0.429	4.621	5.533
7.02	-2.888	-3.939	-1.16	3.215	4.241
7.03	-1.893	-2.958	-2.137	0.982	2.887
7.04	-0.747	-1.645	-2.947	-1.433	1.503
7.05	0.191	-0.582	-3.636	-3.69	0.178
7.06	0.64	-0.036	-3.859	-5.007	-1.019
7.07	0.557	-0.085	-3.587	-5.34	-2.634
7.08	0.191	-0.437	-3.127	-4.748	-4.01
7.09	-0.165	-0.863	-2.482	-3.906	-5.234
7.1	-0.45	-1.102	-1.74	-3.279	-5.927
7.11	-0.33	-0.864	-1.203	-2.956	-6.002
7.12	0.135	-0.234	-0.722	-2.803	-5.485
7.13	0.792	0.738	-0.498	-2.646	-4.462
7.14	1.248	1.588	0.055	-2.262	-2.9
7.15	1.529	2.112	0.679	-1.223	-1.125
7.16	1.711	2.309	1.298	0.249	0.983
7.17	1.37	2.116	2.038	2.012	2.766
7.18	0.717	1.531	2.957	3.703	4.25
7.19	-0.224	0.831	3.824	5.421	4.984
7.2	-1.029	0.125	4.27	6.72	5.22
7.21	-1.45	-0.481	4.328	7.257	5.107
7.22	-1.349	-0.587	3.956	6.71	4.635
7.23	-0.808	-0.051	3.236	5.303	3.943
7.24	-0.083	0.854	2.455	3.198	2.816
7.25	0.619	1.649	1.549	0.936	1.571
7.26	1.065	2.071	0.714	-0.941	0.247
7.27	1.097	1.768	-0.103	-2.079	-0.922
7.28	0.757	0.998	-0.914	-2.51	-2.015
7.29	0.126	-0.168	-1.436	-2.602	-3.096
7.3	-0.547	-1.163	-1.876	-2.658	-4.088
7.31	-0.899	-1.835	-2.135	-2.986	-4.852
7.32	-0.827	-1.87	-2.552	-3.586	-5.294
7.33	-0.187	-1.526	-3.01	-4.232	-4.921
7.34	0.508	-0.707	-3.472	-4.698	-4.09
7.35	1.063	-0.08	-3.614	-4.876	-2.605
7.36	1.003	0.118	-3.473	-4.403	-1.232
7.37	0.426	-0.383	-2.991	-3.081	0.205
7.38	-0.385	-1.371	-2.343	-1.246	1.532
7.39	-1.126	-2.388	-1.71	0.738	2.776
7.4	-1.641	-2.975	-1.216	2.54	3.773
7.41	-1.703	-2.967	-0.595	3.733	4.36
7.42	-1.773	-2.393	0.165	4.043	4.414
7.43	-1.545	-1.522	0.997	3.649	4.034
7.44	-0.971	-0.349	1.61	2.912	3.343
7.45	0.089	0.95	1.86	2.208	2.676
7.46	0.981	2.255	2.203	1.429	1.935
7.47	1.48	3.085	2.438	1.113	1.164
7.48	1.381	3.116	2.893	0.954	0.152
7.49	0.767	2.47	3.158	1.031	-0.885
7.5	0.197	1.453	3.099	1.305	-2.033
7.51	-0.062	0.823	2.657	1.36	-3.008
7.52	0.221	0.832	2.188	0.742	-3.692
7.53	0.74	1.483	1.612	-0.481	-4.224
7.54	1.38	2.298	1.343	-1.917	-4.322
7.55	1.828	2.777	0.882	-2.917	-4.046
7.56	2.047	2.705	0.324	-3.133	-3.132
7.57	1.894	2.009	-0.339	-2.53	-1.935
7.58	1.174	0.853	-0.669	-1.366	-0.628
7.59	-0.035	-0.556	-0.738	0.046	0.537
7.6	-1.27	-2.023	-0.793	1.19	1.501
7.61	-1.959	-3.1	-1.006	1.889	2.46
7.62	-2.126	-3.582	-1.611	1.941	3.311
7.63	-1.754	-3.434	-2.426	1.527	3.779
7.64	-1.342	-2.992	-3.007	0.707	3.852
7.65	-1.086	-2.359	-3.17	-0.271	3.431
7.66	-0.997	-1.812	-2.912	-1.054	2.92
7.67	-0.735	-1.404	-2.54	-1.401	2.397
7.68	-0.515	-1.047	-2.193	-1.112	1.781
7.69	-0.314	-0.925	-1.631	-0.674	1.064
7.7	-0.577	-0.95	-0.876	-0.267	-0.118
7.71	-0.806	-0.958	-0.217	-0.144	-1.432
7.72	-0.883	-0.728	0.208	-0.369	-2.614
7.73	-0.301	-0.12	0.3	-0.891	-3.296
7.74	0.625	0.89	0.314	-1.58	-3.497
7.75	1.573	2.062	0.337	-2.299	-3.648
7.76	2.252	2.935	0.77	-2.546	-3.495
7.77	2.31	3.382	1.372	-2.163	-3.266
7.78	1.956	3.314	2.107	-1.175	-2.528
7.79	1.424	2.742	2.747	0.456	-1.373
7.8	0.831	1.931	3.114	2.225	-0.079
7.81	0.176	0.984	3.438	3.692	1.03
7.82	-0.46	0.221	3.554	4.496	1.693
7.83	-0.722	-0.146	3.324	4.563	2.305
7.84	-0.587	0.053	2.632	3.917	2.863
7.85	-0.086	0.551	1.708	2.892	3.459
7.86	0.442	0.871	0.769	1.85	3.788
7.87	0.402	0.716	0.049	0.934	3.578
7.88	-0.104	-0.025	-0.474	0.334	2.93
7.89	-0.868	-1.085	-0.928	0.148	1.957
7.9	-1.401	-2.068	-1.454	0.191	0.997
7.91	-1.52	-2.606	-1.931	0.008	0.157
7.92	-1.343	-2.505	-2.311	-0.748	-0.827
7.93	-0.869	-2.086	-2.547	-2.021	-1.831
7.94	-0.514	-1.412	-2.687	-3.399	-3.065
7.95	0.074	-0.762	-3.031	-4.597	-3.887
7.96	0.574	-0.112	-3.397	-5.355	-4.051
7.97	1.001	0.251	-3.523	-5.357	-3.578
7.98	1.039	0.216	-3.242	-4.733	-2.718
7.99	0.646	-0.27	-2.658	-3.398	-1.923
8	-0.059	-1.069	-1.812	-1.606	-1.169
8.01	-0.764	-1.633	-0.743	0.165	-0.303
8.02	-1.041	-1.621	0.064	1.668	0.641
8.03	-0.796	-0.984	0.842	2.608	1.666
8.04	-0.287	0.021	1.534	2.906	2.395
8.05	0.264	1.054	2.213	2.735	2.778
8.06	0.568	1.824	2.783	2.465	2.74
8.07	0.78	2.227	3.117	2.501	2.514
8.08	0.822	2.272	3.171	2.757	2.38
8.09	0.593	2.04	3.171	3.018	2.271
8.1	0.185	1.487	3.166	3.143	1.988
8.11	-0.32	0.849	3.017	3.156	1.224
8.12	-0.553	0.273	2.647	2.82	0.322
8.13	-0.488	0.181	1.995	2.022	-0.572
8.14	0.075	0.541	1.317	0.729	-1.393
8.15	0.763	1.2	0.634	-0.826	-2.02
8.16	1.221	1.741	0.168	-2.178	-2.68
8.17	1.366	1.844	-0.203	-3.076	-2.971
8.18	1.215	1.426	-0.606	-3.225	-2.935
8.19	0.863	0.642	-1.144	-2.813	-2.348
8.2	0.243	-0.395	-1.74	-2.014	-1.539
8.21	-0.461	-1.56	-2.195	-1.338	-0.876
8.22	-1.12	-2.595	-2.545	-0.949	-0.478
8.23	-1.474	-3.167	-2.828	-0.948	-0.224
8.24	-1.375	-3.118	-3.122	-1.202	0.254
8.25	-0.858	-2.529	-3.411	-1.561	0.826
8.26	-0.312	-1.702	-3.422	-1.761	1.482
8.27	-0.09	-1.064	-3.089	-1.689	1.829
8.28	-0.334	-0.887	-2.246	-1.29	1.84
8.29	-0.71	-0.978	-1.2	-0.385	1.734
8.3	-0.924	-1.122	-0.411	0.752	1.724
8.31	-0.922	-1.114	0.165	1.74	1.872
8.32	-0.867	-0.954	0.596	2.21	1.839
8.33	-0.848	-0.595	0.959	2.138	1.266
8.34	-0.654	-0.094	1.235	1.556	0.367
8.35	-0.096	0.633	1.356	0.736	-0.64
8.36	0.816	1.588	1.401	-0.134	-1.269
8.37	1.645	2.55	1.498	-0.766	-1.579
8.38	2.053	3.125	1.8	-0.908	-1.738
8.39	1.815	3.164	2.283	-0.476	-1.998
8.4	1.213	2.647	2.888	0.384	-2.173
8.41	0.685	1.959	3.353	1.413	-2.057
8.42	0.451	1.444	3.361	2.182	-1.566
8.43	0.53	1.193	2.94	2.353	-0.808
8.44	0.514	1.064	2.34	1.934	-0.154
8.45	0.369	0.936	1.599	1.066	0.256
8.46	0.316	0.725	0.751	0.273	0.615
8.47	0.312	0.407	-0.203	-0.123	0.995
8.48	0.315	0.005	-0.951	-0.163	1.695
8.49	-0.026	-0.612	-1.233	0.026	2.233
8.5	-0.648	-1.325	-1.304	0.47	2.434
8.51	-1.412	-2.068	-1.198	0.798	2.203
8.52	-1.894	-2.617	-1.295	0.883	1.671
8.53	-1.821	-2.784	-1.659	0.492	1.256
8.54	-1.348	-2.493	-2.394	-0.416	0.704
8.55	-0.759	-1.926	-2.988	-1.701	0.13
8.56	-0.404	-1.373	-3.297	-2.999	-0.719
8.57	-0.137	-0.917	-3.329	-3.933	-1.645
8.58	0.109	-0.612	-3.186	-4.255	-2.266
8.59	0.35	-0.483	-2.89	-3.852	-2.524
8.6	0.378	-0.515	-2.367	-2.879	-2.3
8.61	0.217	-0.612	-1.564	-1.744	-1.863
8.62	-0.178	-0.612	-0.602	-0.647	-1.295
8.63	-0.374	-0.431	0.34	0.327	-0.836
8.64	-0.204	0.06	1.142	0.998	-0.521
8.65	0.342	0.8	1.702	1.394	-0.106
8.66	0.856	1.562	2.082	1.5	0.298
8.67	1.188	2.196	2.44	1.487	0.815
8.68	1.21	2.539	2.826	1.605	1.264
8.69	0.945	2.407	3.055	2.039	1.673
8.7	0.538	1.85	3.139	2.776	1.96
8.71	0.081	1.152	3.137	3.518	2.002
8.72	-0.276	0.573	3.025	3.895	1.897
8.73	-0.502	0.323	2.889	3.733	1.622
8.74	-0.439	0.5	2.562	2.919	1.095
8.75	-0.098	0.796	2.067	1.651	0.395
8.76	0.309	1.054	1.29	0.282	-0.356
8.77	0.617	1.106	0.291	-0.919	-0.996
8.78	0.753	0.82	-0.679	-1.844	-1.455
8.79	0.48	0.288	-1.423	-2.355	-1.613
8.8	0.07	-0.419	-1.863	-2.542	-1.541
8.81	-0.339	-1.129	-2.177	-2.338	-1.381
8.82	-0.529	-1.809	-2.511	-1.897	-1.2
8.83	-0.765	-2.295	-2.779	-1.558	-1.036
8.84	-0.839	-2.467	-2.996	-1.559	-0.772
8.85	-0.771	-2.295	-3.132	-1.889	-0.543
8.86	-0.623	-1.865	-3.067	-2.273	-0.281
8.87	-0.321	-1.381	-2.913	-2.416	0.009
8.88	-0.04	-0.958	-2.62	-2.141	0.364
8.89	0.065	-0.702	-2.167	-1.476	0.79
8.9	-0.145	-0.708	-1.489	-0.546	1.212
8.91	-0.498	-0.857	-0.653	0.532	1.424
8.92	-0.839	-0.98	0.181	1.411	1.434
8.93	-0.954	-0.874	0.869	1.91	1.325
8.94	-0.771	-0.422	1.315	2.072	1.094
8.95	-0.223	0.36	1.568	1.902	0.801
8.96	0.345	1.241	1.779	1.489	0.417
8.97	0.81	1.971	2.095	0.933	-0.008
8.98	1.05	2.447	2.446	0.542	-0.43
8.99	1.174	2.573	2.696	0.541	-0.783
9	1.099	2.431	2.778	0.865	-0.894
9.01	0.893	2.109	2.795	1.314	-0.82
9.02	0.626	1.697	2.705	1.68	-0.767
9.03	0.414	1.297	2.555	1.69	-0.761
9.04	0.301	0.947	2.196	1.284	-0.916
9.05	0.352	0.733	1.48	0.61	-1.078
9.06	0.532	0.628	0.6	-0.283	-1.128
9.07	0.669	0.567	-0.351	-1.141	-0.975
9.08	0.649	0.394	-1.121	-1.719	-0.657
9.09	0.388	-0.036	-1.683	-1.876	-0.338
9.1	-0.067	-0.757	-1.95	-1.675	0.01
9.11	-0.662	-1.6	-2.098	-1.2	0.332
9.12	-1.125	-2.311	-2.215	-0.541	0.752
9.13	-1.425	-2.711	-2.345	-0.017	1.138
9.14	-1.486	-2.779	-2.42	0.072	1.451
9.15	-1.438	-2.57	-2.458	-0.226	1.458
9.16	-1.184	-2.149	-2.442	-0.766	1.239
9.17	-0.822	-1.649	-2.385	-1.267	0.924
9.18	-0.443	-1.15	-2.202	-1.491	0.691
9.19	-0.098	-0.648	-1.857	-1.459	0.591
9.2	0.056	-0.263	-1.32	-1.064	0.501
9.21	0.044	-0.092	-0.643	-0.495	0.271
9.22	-0.15	-0.093	0.017	0.13	-0.107
9.23	-0.195	-0.036	0.745	0.638	-0.568
9.24	-0.069	0.274	1.317	0.876	-0.951
9.25	0.369	0.902	1.762	0.804	-1.261
9.26	0.922	1.744	2.068	0.582	-1.554
9.27	1.422	2.446	2.277	0.295	-1.783
9.28	1.582	2.821	2.46	0.016	-1.806
9.29	1.491	2.806	2.543	0.013	-1.53
9.3	1.217	2.452	2.547	0.433	-0.994
9.31	0.888	1.856	2.394	1.172	-0.231
9.32	0.442	1.229	2.213	1.923	0.514
9.33	-0.004	0.589	2.068	2.507	1.082
9.34	-0.46	0.049	1.888	2.688	1.313
9.35	-0.666	-0.274	1.558	2.374	1.412
9.36	-0.574	-0.347	0.961	1.694	1.388
9.37	-0.264	-0.25	0.158	0.783	1.326
9.38	-0.02	-0.188	-0.646	-0.123	1.129
9.39	-0.027	-0.33	-1.351	-0.821	0.859
9.4	-0.231	-0.732	-1.836	-1.235	0.577
9.41	-0.593	-1.287	-2.079	-1.385	0.341
9.42	-0.878	-1.851	-2.233	-1.331	0.152
9.43	-0.982	-2.22	-2.448	-1.211	-0.092
9.44	-0.921	-2.281	-2.667	-1.26	-0.416
9.45	-0.794	-2.058	-2.764	-1.571	-0.631
9.46	-0.568	-1.688	-2.697	-2.042	-0.886
9.47	-0.256	-1.123	-2.503	-2.416	-1.016
9.48	0.146	-0.603	-2.2	-2.472	-1.013
9.49	0.448	-0.21	-1.8	-2.075	-1.01
9.5	0.522	0.055	-1.139	-1.45	-0.868
9.51	0.351	0.224	-0.365	-0.671	-0.705
9.52	0.034	0.284	0.478	0.161	-0.272
9.53	-0.14	0.3	1.187	0.949	0.174
9.54	-0.139	0.406	1.628	1.604	0.588
9.55	-0.001	0.583	1.919	2.085	0.843
9.56	0.113	0.91	2.209	2.293	0.854
9.57	0.343	1.37	2.501	2.163	0.738
9.58	0.613	1.9	2.696	1.799	0.614
9.59	0.847	2.272	2.782	1.417	0.568
9.6	0.905	2.293	2.622	1.208	0.517
9.61	0.749	1.859	2.302	1.291	0.316
9.62	0.362	1.126	1.936	1.536	0.07
9.63	-0.098	0.405	1.606	1.582	-0.146
9.64	-0.369	-0.026	1.25	1.28	-0.215
9.65	-0.321	-0.159	0.804	0.712	-0.267
9.66	-0.047	-0.107	0.126	-0.023	-0.385
9.67	0.274	-0.05	-0.646	-0.837	-0.506
9.68	0.418	-0.075	-1.343	-1.598	-0.662
9.69	0.33	-0.234	-1.881	-2.161	-0.639
9.7	0.119	-0.577	-2.244	-2.351	-0.573
9.71	-0.2	-1.064	-2.45	-2.163	-0.439
9.72	-0.491	-1.673	-2.534	-1.686	-0.329
9.73	-0.826	-2.175	-2.515	-1.137	-0.273
9.74	-1.016	-2.401	-2.394	-0.776	-0.147
9.75	-1.083	-2.204	-2.193	-0.759	0.027
9.76	-0.952	-1.695	-1.979	-0.953	0.311
9.77	-0.61	-1.114	-1.766	-1.12	0.535
9.78	-0.203	-0.562	-1.49	-1.034	0.697
9.79	0.096	-0.202	-1.111	-0.691	0.739
9.8	0.144	0.008	-0.508	-0.226	0.718
9.81	0.008	0.177	0.23	0.283	0.67
9.82	-0.142	0.323	0.941	0.874	0.555
9.83	-0.231	0.451	1.545	1.478	0.479
9.84	-0.114	0.563	1.904	1.988	0.424
9.85	0.108	0.765	2.119	2.166	0.3
9.86	0.368	1.047	2.268	1.951	0.076
9.87	0.605	1.484	2.398	1.462	-0.219
9.88	0.841	1.967	2.391	0.876	-0.489
9.89	1.133	2.308	2.267	0.387	-0.678
9.9	1.308	2.385	2.031	0.177	-0.794
9.91	1.249	2.075	1.792	0.243	-0.872
9.92	0.867	1.501	1.547	0.4	-0.928
9.93	0.318	0.766	1.359	0.552	-0.956
9.94	-0.203	0.087	1.034	0.63	-0.844
9.95	-0.425	-0.397	0.476	0.601	-0.583
9.96	-0.325	-0.637	-0.225	0.349	-0.177
9.97	-0.156	-0.695	-0.902	-0.138	0.262
9.98	-0.111	-0.707	-1.356	-0.755	0.585
9.99	-0.254	-0.742	-1.658	-1.228	0.763
10	-0.43	-0.889	-1.857	-1.376	0.865
10.01	-0.613	-1.2	-1.98	-1.134	0.956
10.02	-0.71	-1.537	-2.065	-0.699	1.002
10.03	-0.815	-1.858	-2.052	-0.42	0.95
10.04	-0.99	-2.036	-2.003	-0.393	0.779
10.05	-1.138	-2.046	-1.916	-0.552	0.56
10.06	-1.038	-1.872	-1.88	-0.745	0.293
10.07	-0.694	-1.473	-1.835	-0.937	0.079
10.08	-0.124	-0.863	-1.674	-1.061	-0.112
10.09	0.399	-0.085	-1.272	-1.198	-0.362
10.1	0.689	0.599	-0.59	-1.266	-0.623
10.11	0.657	1.016	0.155	-1.14	-0.908
10.12	0.497	1.075	0.773	-0.656	-1.065
10.13	0.393	0.907	1.175	0.151	-1.119
10.14	0.312	0.724	1.476	0.951	-1.002
10.15	0.318	0.755	1.806	1.459	-0.772
10.16	0.352	1.064	2.178	1.596	-0.432
10.17	0.441	1.493	2.493	1.51	-0.087
10.18	0.59	1.803	2.566	1.375	0.206
10.19	0.757	1.895	2.371	1.356	0.415
10.2	0.827	1.748	2.071	1.361	0.598
10.21	0.619	1.424	1.744	1.299	0.699
10.22	0.253	0.924	1.511	1.239	0.747
10.23	-0.173	0.365	1.25	1.257	0.7
10.24	-0.447	-0.161	0.917	1.242	0.579
10.25	-0.514	-0.53	0.485	1.058	0.424
10.26	-0.425	-0.649	-0.038	0.657	0.218
10.27	-0.251	-0.623	-0.583	-0.042	0.105
10.28	-0.174	-0.551	-1.152	-0.869	0.093
10.29	-0.149	-0.65	-1.679	-1.578	0.157
10.3	-0.143	-0.878	-2.18	-1.905	0.104
10.31	-0.154	-1.196	-2.525	-1.872	-0.089
10.32	-0.234	-1.438	-2.607	-1.679	-0.367
10.33	-0.436	-1.537	-2.399	-1.547	-0.586
10.34	-0.6	-1.513	-2.051	-1.485	-0.65
10.35	-0.699	-1.446	-1.777	-1.409	-0.546
10.36	-0.619	-1.348	-1.69	-1.241	-0.43
10.37	-0.37	-1.121	-1.622	-1.025	-0.323
10.38	-0.094	-0.718	-1.408	-0.83	-0.29
10.39	0.13	-0.157	-0.896	-0.714	-0.181
10.4	0.272	0.412	-0.147	-0.537	-0.035
10.41	0.333	0.816	0.626	-0.158	0.097
10.42	0.329	0.963	1.235	0.448	0.281
10.43	0.234	0.924	1.58	1.178	0.332
10.44	0.101	0.77	1.804	1.794	0.405
10.45	-0.071	0.659	1.956	2.124	0.423
10.46	-0.096	0.685	2.131	2.094	0.495
10.47	0.1	0.932	2.212	1.84	0.505
10.48	0.46	1.28	2.195	1.492	0.391
10.49	0.791	1.615	2.052	1.157	0.214
10.5	0.896	1.775	1.842	0.819	-0.026
10.51	0.8	1.62	1.589	0.55	-0.149
10.52	0.507	1.187	1.28	0.419	-0.175
10.53	0.231	0.581	0.928	0.376	-0.211
10.54	0.024	0.025	0.465	0.37	-0.28
10.55	-0.112	-0.373	-0.008	0.232	-0.386
10.56	-0.22	-0.61	-0.476	-0.129	-0.479
10.57	-0.284	-0.742	-0.92	-0.661	-0.531
10.58	-0.279	-0.808	-1.403	-1.211	-0.488
10.59	-0.209	-0.864	-1.897	-1.701	-0.358
10.6	-0.155	-0.926	-2.277	-2.029	-0.245
10.61	-0.152	-1.029	-2.451	-2.04	-0.16
10.62	-0.306	-1.181	-2.414	-1.783	-0.125
10.63	-0.547	-1.39	-2.167	-1.366	0.007
10.64	-0.778	-1.555	-1.837	-0.895	0.157
10.65	-0.9	-1.605	-1.49	-0.475	0.327
10.66	-0.851	-1.47	-1.222	-0.173	0.466
10.67	-0.674	-1.155	-1.035	-0.051	0.531
10.68	-0.36	-0.705	-0.815	-0.104	0.59
10.69	-0.077	-0.22	-0.545	-0.182	0.562
10.7	0.181	0.21	-0.172	-0.144	0.517
10.71	0.333	0.547	0.258	0.062	0.399
10.72	0.417	0.765	0.793	0.401	0.249
10.73	0.393	0.88	1.314	0.824	0.118
10.74	0.345	0.928	1.716	1.224	-0.038
10.75	0.331	0.999	1.995	1.496	-0.225
10.76	0.344	1.105	2.176	1.526	-0.449
10.77	0.438	1.321	2.277	1.295	-0.676
10.78	0.629	1.602	2.265	0.923	-0.825
10.79	0.855	1.837	2.064	0.558	-0.875
10.8	0.954	1.839	1.743	0.271	-0.738
10.81	0.835	1.561	1.324	0.135	-0.57
10.82	0.523	1.006	0.888	0.152	-0.404
10.83	0.112	0.334	0.528	0.284	-0.253
10.84	-0.253	-0.233	0.241	0.447	0.004
10.85	-0.438	-0.593	-0.014	0.515	0.349
10.86	-0.494	-0.761	-0.304	0.43	0.657
10.87	-0.513	-0.857	-0.625	0.221	0.844
10.88	-0.55	-0.956	-0.981	-0.115	0.805
10.89	-0.553	-1.052	-1.349	-0.545	0.69
10.9	-0.469	-1.127	-1.725	-0.964	0.582
10.91	-0.354	-1.176	-2.072	-1.281	0.533
10.92	-0.263	-1.22	-2.302	-1.408	0.465
10.93	-0.327	-1.328	-2.332	-1.34	0.272
10.94	-0.521	-1.444	-2.155	-1.19	0.029
10.95	-0.693	-1.522	-1.828	-1.036	-0.211
10.96	-0.671	-1.401	-1.511	-0.891	-0.387
10.97	-0.407	-1.059	-1.229	-0.776	-0.441
10.98	-0.019	-0.494	-0.903	-0.701	-0.51
10.99	0.3	0.173	-0.431	-0.666	-0.551
11	0.486	0.774	0.196	-0.605	-0.646
11.01	0.534	1.168	0.795	-0.418	-0.677
11.02	0.553	1.291	1.227	-0.006	-0.545
11.03	0.493	1.168	1.438	0.553	-0.298
11.04	0.363	0.913	1.528	1.107	-0.004
11.05	0.152	0.696	1.603	1.498	0.169
11.06	-0.014	0.623	1.713	1.658	0.211
11.07	-0.011	0.712	1.849	1.567	0.136
11.08	0.165	0.924	1.886	1.301	0.006
11.09	0.463	1.185	1.787	0.983	-0.106
11.1	0.667	1.377	1.564	0.645	-0.188
11.11	0.674	1.377	1.281	0.329	-0.19
11.12	0.453	1.094	0.961	0.135	-0.079
11.13	0.16	0.561	0.566	0.145	0.075
11.14	-0.098	-0.124	0.121	0.303	0.259
11.15	-0.3	-0.746	-0.345	0.466	0.379
11.16	-0.457	-1.14	-0.688	0.422	0.492
11.17	-0.563	-1.232	-0.917	0.13	0.52
11.18	-0.561	-1.119	-1.158	-0.33	0.517
11.19	-0.427	-0.986	-1.441	-0.807	0.459
11.2	-0.251	-0.885	-1.75	-1.185	0.349
11.21	-0.075	-0.85	-1.951	-1.377	0.22
11.22	-0.053	-0.827	-1.923	-1.403	0.05
11.23	-0.15	-0.79	-1.624	-1.268	-0.098
11.24	-0.326	-0.772	-1.213	-1.023	-0.243
11.25	-0.466	-0.772	-0.875	-0.716	-0.335
11.26	-0.47	-0.751	-0.703	-0.433	-0.388
11.27	-0.349	-0.639	-0.62	-0.245	-0.445
11.28	-0.155	-0.407	-0.475	-0.198	-0.466
11.29	0.009	-0.021	-0.18	-0.289	-0.438
11.3	0.193	0.456	0.206	-0.338	-0.333
11.31	0.391	0.871	0.613	-0.18	-0.163
11.32	0.545	1.114	0.979	0.228	0.01
11.33	0.55	1.131	1.31	0.742	0.157
11.34	0.386	0.987	1.602	1.234	0.279
11.35	0.131	0.785	1.833	1.558	0.374
11.36	-0.016	0.63	1.893	1.673	0.422
11.37	0.015	0.606	1.74	1.632	0.39
11.38	0.23	0.689	1.492	1.42	0.293
11.39	0.412	0.813	1.229	0.999	0.132
11.4	0.484	0.865	1.011	0.496	-0.072
11.41	0.431	0.796	0.77	0.059	-0.242
11.42	0.307	0.612	0.458	-0.243	-0.307
11.43	0.203	0.335	0.07	-0.385	-0.283
11.44	0.096	0.016	-0.34	-0.368	-0.179
11.45	-0.062	-0.353	-0.646	-0.302	-0.123
11.46	-0.337	-0.747	-0.812	-0.293	-0.125
11.47	-0.605	-1.058	-0.9	-0.378	-0.154
11.48	-0.696	-1.192	-1.028	-0.553	-0.146
11.49	-0.544	-1.068	-1.286	-0.752	-0.065
11.5	-0.242	-0.835	-1.549	-0.98	0.061
11.51	-0.026	-0.609	-1.686	-1.186	0.162
11.52	-0.033	-0.543	-1.606	-1.299	0.189
11.53	-0.209	-0.657	-1.396	-1.188	0.153
11.54	-0.384	-0.803	-1.18	-0.85	0.119
11.55	-0.423	-0.878	-0.984	-0.407	0.142
11.56	-0.38	-0.83	-0.796	-0.042	0.158
11.57	-0.308	-0.684	-0.521	0.119	0.128
11.58	-0.222	-0.434	-0.216	0.126	0
11.59	-0.071	-0.096	0.077	0.052	-0.128
11.6	0.191	0.359	0.341	-0.003	-0.161
11.61	0.465	0.833	0.598	0.029	-0.149
11.62	0.665	1.162	0.921	0.2	-0.122
11.63	0.626	1.24	1.26	0.493	-0.126
11.64	0.431	1.093	1.546	0.817	-0.143
11.65	0.188	0.838	1.69	1.09	-0.098
11.66	0.071	0.654	1.647	1.292	-0.025
11.67	0.078	0.586	1.498	1.357	0.061
11.68	0.155	0.62	1.318	1.23	0.093
11.69	0.214	0.679	1.185	0.925	0.067
11.7	0.215	0.704	1.042	0.541	0.039
11.71	0.218	0.675	0.81	0.216	0.054
11.72	0.254	0.564	0.482	0.053	0.115
11.73	0.23	0.368	0.155	0.021	0.149
11.74	0.127	0.075	-0.07	0.026	0.148
11.75	-0.092	-0.231	-0.247	0.01	0.077
11.76	-0.33	-0.552	-0.421	-0.087	0.036
11.77	-0.483	-0.866	-0.709	-0.272	0.012
11.78	-0.523	-1.087	-1.111	-0.53	0.012
11.79	-0.43	-1.172	-1.533	-0.831	-0.013
11.8	-0.307	-1.118	-1.854	-1.131	-0.064
11.81	-0.15	-0.934	-1.97	-1.382	-0.092
11.82	-0.069	-0.71	-1.846	-1.5	-0.08
11.83	-0.044	-0.561	-1.538	-1.383	-0.051
11.84	-0.108	-0.537	-1.149	-1.03	-0.05
11.85	-0.224	-0.576	-0.787	-0.537	-0.092
11.86	-0.337	-0.616	-0.474	-0.085	-0.11
11.87	-0.387	-0.56	-0.22	0.177	-0.064
11.88	-0.322	-0.349	-0.037	0.245	0.028
11.89	-0.138	-0.059	0.112	0.208	0.137
11.9	0.116	0.257	0.266	0.159	0.144
11.91	0.312	0.557	0.487	0.141	0.078
11.92	0.411	0.81	0.749	0.234	-0.057
11.93	0.429	0.981	1.042	0.403	-0.148
11.94	0.393	1.051	1.304	0.612	-0.152
11.95	0.319	0.999	1.492	0.854	-0.098
11.96	0.261	0.848	1.592	1.093	-0.046
11.97	0.167	0.698	1.603	1.269	-0.064
11.98	0.109	0.592	1.547	1.299	-0.086
11.99	0.119	0.587	1.38	1.141	-0.038
12	0.218	0.656	1.109	0.784	0.109
12.01	0.316	0.678	0.74	0.349	0.282
12.02	0.343	0.537	0.314	0.016	0.385
12.03	0.251	0.228	-0.106	-0.154	0.341
12.04	0.033	-0.167	-0.413	-0.176	0.22
12.05	-0.203	-0.52	-0.595	-0.141	0.104
12.06	-0.368	-0.714	-0.663	-0.15	0.033
12.07	-0.406	-0.756	-0.706	-0.273	-0.05
12.08	-0.368	-0.758	-0.815	-0.502	-0.172
12.09	-0.312	-0.75	-1.032	-0.804	-0.344
12.1	-0.255	-0.74	-1.31	-1.123	-0.473
12.11	-0.199	-0.74	-1.579	-1.378	-0.503
12.12	-0.149	-0.695	-1.728	-1.53	-0.395
12.13	-0.098	-0.627	-1.681	-1.491	-0.226
12.14	-0.122	-0.592	-1.436	-1.228	-0.088
12.15	-0.206	-0.623	-1.073	-0.767	0.009
12.16	-0.339	-0.667	-0.679	-0.234	0.074
12.17	-0.401	-0.671	-0.312	0.245	0.201
12.18	-0.357	-0.526	-0.02	0.539	0.377
12.19	-0.199	-0.212	0.222	0.632	0.509
12.2	0.036	0.182	0.458	0.602	0.524
12.21	0.259	0.558	0.695	0.531	0.409
12.22	0.408	0.863	0.941	0.458	0.206
12.23	0.463	1.03	1.154	0.456	0.029
12.24	0.459	1.057	1.292	0.562	-0.123
12.25	0.39	0.967	1.352	0.706	-0.202
12.26	0.272	0.798	1.335	0.837	-0.271
12.27	0.174	0.602	1.277	0.892	-0.31
12.28	0.121	0.515	1.175	0.848	-0.343
12.29	0.155	0.541	1.054	0.701	-0.364
12.3	0.231	0.641	0.939	0.459	-0.34
12.31	0.3	0.749	0.8	0.17	-0.281
12.32	0.328	0.731	0.621	-0.05	-0.183
12.33	0.285	0.524	0.327	-0.131	-0.062
12.34	0.14	0.159	-0.012	-0.117	0.115
12.35	-0.1	-0.265	-0.373	-0.059	0.285
12.36	-0.35	-0.674	-0.661	-0.014	0.406
12.37	-0.52	-0.97	-0.859	-0.056	0.431
12.38	-0.58	-1.108	-1.019	-0.208	0.378
12.39	-0.485	-1.101	-1.171	-0.452	0.309
12.4	-0.312	-0.972	-1.356	-0.726	0.243
12.41	-0.176	-0.803	-1.498	-0.969	0.151
12.42	-0.133	-0.684	-1.527	-1.122	0.037
12.43	-0.136	-0.605	-1.434	-1.137	-0.121
12.44	-0.145	-0.548	-1.203	-1.052	-0.237
12.45	-0.127	-0.492	-0.921	-0.849	-0.278
12.46	-0.117	-0.426	-0.646	-0.541	-0.224
12.47	-0.144	-0.366	-0.391	-0.199	-0.137
12.48	-0.215	-0.305	-0.126	0.074	-0.112
12.49	-0.203	-0.171	0.133	0.245	-0.124
12.5	-0.063	0.111	0.375	0.317	-0.14
12.51	0.208	0.479	0.602	0.31	-0.101
12.52	0.43	0.835	0.825	0.306	-0.03
12.53	0.498	1.04	1.066	0.397	0.033
12.54	0.398	1.038	1.293	0.636	0.027
12.55	0.24	0.886	1.455	0.962	0.027
12.56	0.132	0.715	1.547	1.243	0.075
12.57	0.121	0.629	1.543	1.379	0.194
12.58	0.176	0.638	1.46	1.305	0.296
12.59	0.204	0.682	1.305	1.049	0.329
12.6	0.2	0.667	1.062	0.702	0.235
12.61	0.214	0.567	0.723	0.323	0.066
12.62	0.228	0.405	0.299	-0.035	-0.089
12.63	0.222	0.186	-0.143	-0.315	-0.2
12.64	0.162	-0.065	-0.508	-0.515	-0.255
12.65	0.002	-0.303	-0.746	-0.665	-0.286
12.66	-0.2	-0.534	-0.874	-0.76	-0.333
12.67	-0.355	-0.74	-0.983	-0.783	-0.375
12.68	-0.409	-0.89	-1.13	-0.773	-0.349
12.69	-0.394	-0.984	-1.315	-0.774	-0.236
12.7	-0.342	-1.01	-1.455	-0.845	-0.067
12.71	-0.309	-0.94	-1.518	-0.97	0.056
12.72	-0.288	-0.828	-1.504	-1.051	0.103
12.73	-0.248	-0.727	-1.403	-0.999	0.102
12.74	-0.216	-0.646	-1.218	-0.793	0.13
12.75	-0.215	-0.592	-0.944	-0.46	0.242
12.76	-0.248	-0.542	-0.581	-0.066	0.421
12.77	-0.279	-0.441	-0.176	0.312	0.555
12.78	-0.275	-0.279	0.213	0.623	0.626
12.79	-0.167	-0.059	0.526	0.828	0.54
12.8	0.014	0.26	0.769	0.871	0.369
12.81	0.246	0.637	0.979	0.779	0.154
12.82	0.448	0.994	1.184	0.604	-0.039
12.83	0.571	1.254	1.359	0.411	-0.214
12.84	0.57	1.313	1.444	0.329	-0.399
12.85	0.496	1.144	1.413	0.434	-0.526
12.86	0.363	0.874	1.273	0.634	-0.578
12.87	0.239	0.63	1.127	0.766	-0.496
12.88	0.159	0.502	1.035	0.766	-0.365
12.89	0.138	0.515	0.998	0.614	-0.264
12.9	0.159	0.575	0.911	0.39	-0.231
12.91	0.2	0.561	0.69	0.18	-0.235
12.92	0.212	0.427	0.354	0.005	-0.2
12.93	0.15	0.191	-0.036	-0.165	-0.109
12.94	0.033	-0.121	-0.396	-0.314	0.038
12.95	-0.124	-0.433	-0.722	-0.419	0.173
12.96	-0.297	-0.72	-0.95	-0.446	0.307
12.97	-0.437	-0.963	-1.11	-0.366	0.455
12.98	-0.529	-1.142	-1.218	-0.237	0.602
12.99	-0.571	-1.225	-1.27	-0.155	0.74
13	-0.55	-1.215	-1.276	-0.193	0.797
13.01	-0.477	-1.083	-1.257	-0.382	0.733
13.02	-0.339	-0.841	-1.235	-0.622	0.565
13.03	-0.173	-0.584	-1.196	-0.797	0.307
13.04	-0.035	-0.37	-1.079	-0.862	0.018
13.05	0.017	-0.239	-0.857	-0.83	-0.285
13.06	-0.018	-0.193	-0.539	-0.701	-0.561
13.07	-0.08	-0.16	-0.214	-0.509	-0.784
13.08	-0.094	-0.074	0.062	-0.311	-0.897
13.09	0.014	0.117	0.251	-0.135	-0.884
13.1	0.187	0.405	0.404	-0.025	-0.752
13.11	0.351	0.706	0.596	0.018	-0.61
13.12	0.441	0.921	0.844	0.082	-0.518
13.13	0.469	1.017	1.112	0.232	-0.449
13.14	0.443	1.05	1.34	0.509	-0.299
13.15	0.396	1.004	1.491	0.865	-0.019
13.16	0.318	0.915	1.55	1.226	0.332
13.17	0.176	0.748	1.535	1.489	0.669
13.18	0.001	0.497	1.431	1.611	0.897
13.19	-0.125	0.228	1.243	1.569	1.016
13.2	-0.151	0.068	0.957	1.39	1.067
13.21	-0.08	0.021	0.616	1.079	1.074
13.22	0.036	0.046	0.256	0.653	0.972
13.23	0.086	0.058	-0.069	0.176	0.689
13.24	0.045	-0.033	-0.337	-0.27	0.256
13.25	-0.047	-0.223	-0.594	-0.631	-0.205
13.26	-0.125	-0.414	-0.849	-0.904	-0.567
13.27	-0.166	-0.573	-1.092	-1.103	-0.764
13.28	-0.192	-0.704	-1.305	-1.247	-0.857
13.29	-0.24	-0.799	-1.458	-1.342	-0.912
13.3	-0.283	-0.875	-1.53	-1.401	-0.957
13.31	-0.275	-0.878	-1.547	-1.435	-0.933
13.32	-0.199	-0.755	-1.504	-1.446	-0.789
13.33	-0.08	-0.545	-1.381	-1.373	-0.554
13.34	0.008	-0.356	-1.167	-1.171	-0.285
13.35	-0.02	-0.252	-0.878	-0.821	-0.041
13.36	-0.134	-0.274	-0.521	-0.326	0.186
13.37	-0.247	-0.36	-0.153	0.239	0.415
13.38	-0.303	-0.382	0.187	0.761	0.663
13.39	-0.261	-0.268	0.505	1.125	0.866
13.4	-0.133	-0.002	0.78	1.271	0.955
13.41	0.029	0.368	1.011	1.223	0.913
13.42	0.174	0.703	1.179	1.09	0.772
13.43	0.309	0.895	1.274	0.961	0.591
13.44	0.382	0.952	1.299	0.863	0.382
13.45	0.389	0.907	1.308	0.808	0.138
13.46	0.354	0.837	1.3	0.774	-0.123
13.47	0.296	0.81	1.279	0.706	-0.393
13.48	0.249	0.809	1.225	0.576	-0.591
13.49	0.247	0.766	1.102	0.392	-0.698
13.5	0.258	0.673	0.861	0.168	-0.724
13.51	0.249	0.511	0.532	-0.08	-0.702
13.52	0.212	0.304	0.149	-0.31	-0.639
13.53	0.152	0.106	-0.227	-0.524	-0.525
13.54	0.085	-0.077	-0.551	-0.684	-0.376
13.55	0.011	-0.271	-0.789	-0.753	-0.2
13.56	-0.094	-0.468	-0.937	-0.738	-0.041
13.57	-0.237	-0.659	-1.017	-0.649	0.103
13.58	-0.379	-0.861	-1.072	-0.519	0.228
13.59	-0.49	-1.025	-1.141	-0.405	0.359
13.6	-0.537	-1.118	-1.229	-0.344	0.506
13.61	-0.508	-1.148	-1.333	-0.363	0.632
13.62	-0.429	-1.097	-1.397	-0.456	0.687
13.63	-0.339	-0.95	-1.365	-0.563	0.614
13.64	-0.253	-0.757	-1.202	-0.593	0.436
13.65	-0.179	-0.524	-0.931	-0.543	0.22
13.66	-0.125	-0.297	-0.578	-0.433	0.021
13.67	-0.078	-0.113	-0.217	-0.259	-0.131
13.68	-0.038	0.014	0.105	-0.052	-0.256
13.69	-0.01	0.133	0.359	0.148	-0.347
13.7	0.054	0.274	0.582	0.316	-0.398
13.71	0.168	0.494	0.807	0.428	-0.391
13.72	0.304	0.788	1.039	0.471	-0.339
13.73	0.444	1.051	1.253	0.502	-0.285
13.74	0.529	1.198	1.41	0.563	-0.249
13.75	0.514	1.191	1.497	0.659	-0.233
13.76	0.419	1.051	1.496	0.774	-0.227
13.77	0.312	0.859	1.41	0.872	-0.179
13.78	0.223	0.71	1.267	0.895	-0.106
13.79	0.175	0.604	1.108	0.824	0.007
13.8	0.15	0.495	0.905	0.687	0.109
13.81	0.123	0.359	0.653	0.515	0.201
13.82	0.081	0.17	0.35	0.342	0.268
13.83	0.027	-0.037	0.008	0.14	0.313
13.84	-0.045	-0.206	-0.327	-0.098	0.364
13.85	-0.129	-0.353	-0.649	-0.32	0.393
13.86	-0.207	-0.535	-0.925	-0.468	0.391
13.87	-0.311	-0.771	-1.133	-0.552	0.35
13.88	-0.429	-1.029	-1.288	-0.578	0.256
13.89	-0.507	-1.214	-1.402	-0.619	0.138
13.9	-0.515	-1.226	-1.483	-0.743	-0.004
13.91	-0.446	-1.081	-1.522	-0.954	-0.14
13.92	-0.302	-0.848	-1.515	-1.183	-0.268
13.93	-0.149	-0.603	-1.445	-1.342	-0.37
13.94	-0.047	-0.436	-1.289	-1.342	-0.466
13.95	-0.013	-0.354	-1.052	-1.167	-0.56
13.96	-0.018	-0.279	-0.747	-0.859	-0.606
13.97	-0.047	-0.163	-0.394	-0.491	-0.579
13.98	-0.04	-0.029	-0.005	-0.129	-0.464
13.99	0.008	0.138	0.362	0.203	-0.315
14	0.086	0.324	0.694	0.489	-0.147
14.01	0.161	0.513	0.971	0.707	0.038
14.02	0.208	0.697	1.196	0.873	0.225
14.03	0.253	0.864	1.376	1.037	0.43
14.04	0.306	0.945	1.506	1.219	0.616
14.05	0.348	0.953	1.578	1.371	0.735
14.06	0.329	0.898	1.616	1.444	0.753
14.07	0.254	0.801	1.59	1.422	0.65
14.08	0.165	0.697	1.478	1.288	0.449
14.09	0.103	0.607	1.273	1.049	0.224
14.1	0.107	0.518	0.991	0.739	0.009
14.11	0.159	0.426	0.643	0.349	-0.183
14.12	0.2	0.327	0.256	-0.078	-0.361
14.13	0.188	0.17	-0.132	-0.476	-0.514
14.14	0.117	-0.023	-0.492	-0.798	-0.622
14.15	0.014	-0.227	-0.807	-1.008	-0.641
14.16	-0.075	-0.433	-1.061	-1.085	-0.572
14.17	-0.162	-0.631	-1.259	-1.069	-0.414
14.18	-0.267	-0.818	-1.391	-1.001	-0.226
14.19	-0.397	-1.014	-1.462	-0.908	-0.05
14.2	-0.497	-1.176	-1.488	-0.809	0.093
14.21	-0.543	-1.228	-1.489	-0.705	0.215
14.22	-0.479	-1.148	-1.443	-0.621	0.327
14.23	-0.345	-0.952	-1.33	-0.579	0.406
14.24	-0.232	-0.682	-1.132	-0.563	0.435
14.25	-0.173	-0.459	-0.862	-0.493	0.398
14.26	-0.15	-0.327	-0.562	-0.322	0.297
14.27	-0.15	-0.238	-0.263	-0.079	0.17
14.28	-0.119	-0.138	0.042	0.186	0.058
14.29	-0.033	0.033	0.353	0.409	-0.023
14.3	0.076	0.301	0.673	0.541	-0.07
14.31	0.182	0.597	0.991	0.616	-0.092
14.32	0.285	0.848	1.267	0.689	-0.105
14.33	0.369	1.041	1.453	0.771	-0.129
14.34	0.435	1.142	1.555	0.852	-0.154
14.35	0.478	1.155	1.582	0.906	-0.154
14.36	0.463	1.12	1.543	0.879	-0.115
14.37	0.404	1.021	1.451	0.801	-0.064
14.38	0.318	0.844	1.29	0.734	-0.035
14.39	0.231	0.634	1.058	0.67	-0.062
14.4	0.146	0.43	0.782	0.562	-0.128
14.41	0.105	0.261	0.496	0.36	-0.197
14.42	0.082	0.155	0.208	0.056	-0.225
14.43	0.059	0.059	-0.083	-0.262	-0.191
14.44	0.036	-0.103	-0.411	-0.495	-0.129
14.45	-0.035	-0.328	-0.752	-0.619	-0.044
14.46	-0.17	-0.595	-1.052	-0.649	0.036
14.47	-0.324	-0.874	-1.267	-0.629	0.133
14.48	-0.45	-1.077	-1.399	-0.628	0.25
14.49	-0.526	-1.187	-1.452	-0.646	0.375
14.5	-0.526	-1.222	-1.483	-0.656	0.457
14.51	-0.485	-1.176	-1.488	-0.65	0.463
14.52	-0.428	-1.046	-1.434	-0.636	0.387
14.53	-0.351	-0.859	-1.277	-0.622	0.279
14.54	-0.252	-0.621	-1.013	-0.619	0.157
14.55	-0.148	-0.352	-0.696	-0.584	0.025
14.56	-0.035	-0.133	-0.383	-0.469	-0.11
14.57	0.038	0.025	-0.117	-0.286	-0.256
14.58	0.066	0.143	0.119	-0.09	-0.394
14.59	0.07	0.239	0.351	0.077	-0.498
14.6	0.11	0.374	0.584	0.199	-0.552
14.61	0.186	0.567	0.82	0.283	-0.548
14.62	0.312	0.782	1.039	0.361	-0.489
14.63	0.431	0.971	1.218	0.468	-0.398
14.64	0.492	1.098	1.354	0.603	-0.269
14.65	0.487	1.118	1.447	0.755	-0.122
14.66	0.429	1.042	1.466	0.876	0.044
14.67	0.333	0.909	1.398	0.929	0.198
14.68	0.241	0.723	1.238	0.906	0.303
14.69	0.153	0.508	0.978	0.813	0.333
14.7	0.063	0.282	0.652	0.652	0.295
14.71	-0.022	0.053	0.305	0.436	0.231
14.72	-0.086	-0.152	-0.043	0.185	0.175
14.73	-0.134	-0.319	-0.353	-0.049	0.144
14.74	-0.161	-0.455	-0.606	-0.238	0.156
14.75	-0.191	-0.565	-0.801	-0.37	0.186
14.76	-0.244	-0.656	-0.938	-0.452	0.225
14.77	-0.311	-0.744	-1.008	-0.479	0.259
14.78	-0.372	-0.82	-1.05	-0.463	0.271
14.79	-0.391	-0.858	-1.063	-0.444	0.256
14.8	-0.357	-0.835	-1.045	-0.459	0.242
14.81	-0.281	-0.746	-1.005	-0.518	0.217
14.82	-0.205	-0.605	-0.952	-0.599	0.162
14.83	-0.14	-0.456	-0.871	-0.652	0.063
14.84	-0.093	-0.329	-0.756	-0.658	-0.086
14.85	-0.053	-0.205	-0.585	-0.614	-0.25
14.86	0.008	-0.068	-0.362	-0.514	-0.395
14.87	0.081	0.077	-0.109	-0.366	-0.503
14.88	0.127	0.218	0.167	-0.188	-0.58
14.89	0.137	0.344	0.448	0.01	-0.632
14.9	0.131	0.437	0.694	0.216	-0.616
14.91	0.143	0.535	0.879	0.388	-0.523
14.92	0.197	0.652	1.004	0.516	-0.321
14.93	0.282	0.759	1.079	0.64	-0.044
14.94	0.333	0.808	1.13	0.753	0.231
14.95	0.312	0.777	1.155	0.889	0.444
14.96	0.235	0.649	1.141	1.039	0.58
14.97	0.142	0.494	1.089	1.13	0.642
14.98	0.066	0.366	0.991	1.098	0.674
14.99	0.044	0.282	0.838	0.964	0.656
15	0.035	0.225	0.638	0.744	0.591
15.01	0.035	0.161	0.394	0.482	0.441
15.02	0.007	0.057	0.118	0.203	0.262
15.03	-0.029	-0.085	-0.155	-0.077	0.075
15.04	-0.071	-0.229	-0.419	-0.357	-0.093
15.05	-0.098	-0.361	-0.679	-0.638	-0.232
15.06	-0.114	-0.456	-0.935	-0.907	-0.37
15.07	-0.142	-0.533	-1.166	-1.127	-0.503
15.08	-0.179	-0.634	-1.36	-1.279	-0.631
15.09	-0.223	-0.758	-1.494	-1.348	-0.744
15.1	-0.268	-0.864	-1.535	-1.342	-0.829
15.11	-0.282	-0.889	-1.466	-1.279	-0.825
15.12	-0.254	-0.779	-1.297	-1.159	-0.713
15.13	-0.188	-0.567	-1.046	-0.962	-0.508
15.14	-0.113	-0.34	-0.747	-0.676	-0.22
15.15	-0.065	-0.171	-0.423	-0.323	0.093
15.16	-0.062	-0.082	-0.1	0.076	0.401
15.17	-0.086	-0.056	0.2	0.486	0.671
15.18	-0.107	-0.02	0.466	0.854	0.891
15.19	-0.11	0.063	0.692	1.131	1.025
15.2	-0.071	0.176	0.883	1.286	1.042
15.21	-0.002	0.323	1.042	1.333	0.946
15.22	0.081	0.483	1.166	1.278	0.752
15.23	0.185	0.645	1.259	1.146	0.514
15.24	0.309	0.814	1.309	0.954	0.273
15.25	0.402	0.953	1.305	0.741	0.018
15.26	0.457	1.023	1.247	0.521	-0.241
15.27	0.455	1.013	1.129	0.305	-0.536
15.28	0.397	0.913	0.972	0.08	-0.819
15.29	0.324	0.742	0.76	-0.152	-1.056
15.3	0.261	0.539	0.469	-0.372	-1.178
15.31	0.203	0.321	0.117	-0.557	-1.155
15.32	0.125	0.075	-0.253	-0.69	-0.972
15.33	0.028	-0.184	-0.602	-0.743	-0.673
15.34	-0.094	-0.435	-0.877	-0.712	-0.313
15.35	-0.198	-0.653	-1.039	-0.61	0.068
15.36	-0.282	-0.789	-1.107	-0.469	0.422
15.37	-0.334	-0.853	-1.079	-0.336	0.707
15.38	-0.382	-0.862	-1.008	-0.226	0.88
15.39	-0.429	-0.867	-0.954	-0.139	0.934
15.4	-0.475	-0.898	-0.948	-0.081	0.891
15.41	-0.488	-0.956	-0.972	-0.072	0.78
15.42	-0.472	-0.98	-1.007	-0.126	0.634
15.43	-0.418	-0.921	-0.985	-0.232	0.469
15.44	-0.321	-0.742	-0.879	-0.338	0.277
15.45	-0.18	-0.451	-0.689	-0.399	0.089
15.46	-0.025	-0.131	-0.415	-0.381	-0.086
15.47	0.111	0.152	-0.086	-0.271	-0.256
15.48	0.197	0.373	0.273	-0.111	-0.429
15.49	0.233	0.541	0.622	0.057	-0.596
15.5	0.264	0.698	0.935	0.201	-0.726
15.51	0.314	0.876	1.166	0.298	-0.78
15.52	0.386	1.032	1.3	0.359	-0.747
15.53	0.46	1.109	1.341	0.427	-0.633
15.54	0.493	1.076	1.313	0.519	-0.48
15.55	0.448	0.949	1.243	0.613	-0.296
15.56	0.351	0.779	1.158	0.695	-0.092
15.57	0.243	0.625	1.035	0.752	0.121
15.58	0.158	0.491	0.877	0.761	0.333
15.59	0.095	0.349	0.695	0.734	0.514
15.6	0.034	0.173	0.492	0.684	0.628
15.61	-0.047	-0.015	0.287	0.592	0.662
15.62	-0.141	-0.196	0.075	0.46	0.639
15.63	-0.212	-0.353	-0.168	0.263	0.591
15.64	-0.257	-0.482	-0.463	0.003	0.527
15.65	-0.27	-0.621	-0.794	-0.295	0.424
15.66	-0.289	-0.773	-1.129	-0.607	0.256
15.67	-0.312	-0.898	-1.411	-0.908	0.044
15.68	-0.325	-0.953	-1.602	-1.154	-0.177
15.69	-0.305	-0.928	-1.679	-1.331	-0.387
15.7	-0.257	-0.841	-1.637	-1.411	-0.591
15.71	-0.202	-0.729	-1.494	-1.394	-0.768
15.72	-0.179	-0.627	-1.277	-1.309	-0.9
15.73	-0.165	-0.515	-1.026	-1.185	-0.948
15.74	-0.138	-0.375	-0.768	-1.013	-0.886
15.75	-0.065	-0.208	-0.531	-0.772	-0.707
15.76	0.026	-0.034	-0.287	-0.454	-0.441
15.77	0.101	0.114	-0.007	-0.064	-0.125
15.78	0.124	0.217	0.316	0.355	0.166
15.79	0.092	0.305	0.678	0.755	0.421
15.8	0.062	0.401	1.029	1.11	0.636
15.81	0.075	0.528	1.318	1.387	0.815
15.82	0.141	0.677	1.529	1.571	0.927
15.83	0.211	0.82	1.673	1.671	0.976
15.84	0.252	0.899	1.76	1.686	0.936
15.85	0.254	0.917	1.782	1.613	0.818
15.86	0.247	0.882	1.705	1.465	0.645
15.87	0.249	0.826	1.516	1.218	0.431
15.88	0.273	0.764	1.229	0.891	0.188
15.89	0.286	0.674	0.878	0.505	-0.068
15.9	0.258	0.524	0.512	0.104	-0.304
15.91	0.19	0.313	0.152	-0.273	-0.516
15.92	0.105	0.065	-0.201	-0.579	-0.681
15.93	0.011	-0.173	-0.545	-0.822	-0.801
15.94	-0.051	-0.355	-0.845	-1.021	-0.886
15.95	-0.1	-0.479	-1.101	-1.208	-0.927
15.96	-0.131	-0.568	-1.297	-1.382	-0.9
15.97	-0.166	-0.662	-1.462	-1.5	-0.775
15.98	-0.222	-0.803	-1.627	-1.503	-0.571
15.99	-0.303	-0.99	-1.744	-1.375	-0.312
16	-0.405	-1.165	-1.781	-1.116	-0.033
16.01	-0.491	-1.26	-1.699	-0.789	0.25
16.02	-0.539	-1.232	-1.485	-0.476	0.526
16.03	-0.514	-1.085	-1.171	-0.204	0.778
16.04	-0.44	-0.861	-0.822	0.04	0.954
16.05	-0.342	-0.61	-0.467	0.266	1.016
16.06	-0.239	-0.36	-0.12	0.488	0.97
16.07	-0.137	-0.094	0.225	0.661	0.843
16.08	-0.038	0.187	0.563	0.759	0.677
16.09	0.089	0.458	0.86	0.8	0.473
16.1	0.212	0.682	1.093	0.794	0.205
16.11	0.307	0.846	1.283	0.753	-0.117
16.12	0.381	0.967	1.415	0.696	-0.465
16.13	0.458	1.096	1.497	0.601	-0.764
16.14	0.535	1.24	1.55	0.489	-0.945
16.15	0.602	1.35	1.561	0.389	-1.002
16.16	0.635	1.37	1.516	0.311	-0.954
16.17	0.603	1.284	1.409	0.277	-0.852
16.18	0.505	1.083	1.24	0.293	-0.676
16.19	0.37	0.807	0.999	0.325	-0.422
16.2	0.222	0.491	0.684	0.361	-0.087
16.21	0.066	0.146	0.328	0.384	0.272
16.22	-0.089	-0.204	-0.032	0.374	0.588
16.23	-0.248	-0.523	-0.371	0.316	0.784
16.24	-0.38	-0.778	-0.663	0.185	0.862
16.25	-0.46	-0.936	-0.922	-0.033	0.837
16.26	-0.475	-1.006	-1.165	-0.309	0.749
16.27	-0.453	-1.038	-1.394	-0.596	0.628
16.28	-0.423	-1.072	-1.593	-0.848	0.485
16.29	-0.426	-1.123	-1.736	-1.025	0.297
16.3	-0.455	-1.175	-1.787	-1.115	0.069
16.31	-0.471	-1.176	-1.733	-1.141	-0.17
16.32	-0.429	-1.07	-1.608	-1.128	-0.377
16.33	-0.333	-0.863	-1.397	-1.086	-0.531
16.34	-0.201	-0.593	-1.097	-1.02	-0.644
16.35	-0.077	-0.308	-0.752	-0.905	-0.701
16.36	0.038	-0.037	-0.38	-0.709	-0.718
16.37	0.131	0.204	-0.007	-0.431	-0.673
16.38	0.225	0.436	0.36	-0.112	-0.555
16.39	0.296	0.662	0.735	0.211	-0.38
16.4	0.357	0.863	1.114	0.528	-0.191
16.41	0.392	0.997	1.437	0.829	-0.004
16.42	0.391	1.062	1.669	1.101	0.166
16.43	0.359	1.042	1.791	1.338	0.306
16.44	0.321	0.971	1.811	1.506	0.428
16.45	0.284	0.906	1.755	1.557	0.512
16.46	0.27	0.862	1.654	1.48	0.561
16.47	0.282	0.831	1.501	1.292	0.578
16.48	0.267	0.774	1.278	1.036	0.557
16.49	0.211	0.64	0.981	0.769	0.495
16.5	0.124	0.404	0.623	0.53	0.397
16.51	0.017	0.122	0.237	0.287	0.26
16.52	-0.092	-0.163	-0.133	0.016	0.094
16.53	-0.183	-0.414	-0.483	-0.295	-0.087
16.54	-0.239	-0.593	-0.834	-0.642	-0.259
16.55	-0.268	-0.727	-1.185	-0.985	-0.432
16.56	-0.273	-0.847	-1.508	-1.284	-0.572
16.57	-0.27	-0.928	-1.767	-1.525	-0.669
16.58	-0.271	-0.975	-1.936	-1.681	-0.711
16.59	-0.269	-1.015	-1.98	-1.722	-0.679
16.6	-0.273	-1.025	-1.918	-1.634	-0.573
16.61	-0.303	-0.997	-1.762	-1.405	-0.421
16.62	-0.33	-0.946	-1.493	-1.061	-0.242
16.63	-0.346	-0.841	-1.156	-0.677	-0.052
16.64	-0.334	-0.675	-0.78	-0.308	0.14
16.65	-0.27	-0.474	-0.389	0.036	0.338
16.66	-0.17	-0.24	-0.022	0.353	0.545
16.67	-0.063	0.012	0.319	0.643	0.721
16.68	0.036	0.254	0.663	0.919	0.818
16.69	0.117	0.483	1.021	1.145	0.825
16.7	0.175	0.718	1.364	1.299	0.735
16.71	0.253	0.924	1.666	1.383	0.585
16.72	0.341	1.09	1.87	1.398	0.41
16.73	0.407	1.209	1.948	1.331	0.227
16.74	0.45	1.252	1.918	1.195	0
16.75	0.469	1.229	1.792	1.004	-0.255
16.76	0.46	1.17	1.593	0.755	-0.502
16.77	0.453	1.073	1.351	0.472	-0.705
16.78	0.455	0.941	1.062	0.18	-0.802
16.79	0.417	0.777	0.72	-0.101	-0.803
16.8	0.327	0.535	0.347	-0.327	-0.755
16.81	0.192	0.205	-0.054	-0.483	-0.678
16.82	0.02	-0.147	-0.468	-0.601	-0.534
16.83	-0.151	-0.49	-0.851	-0.677	-0.34
16.84	-0.276	-0.79	-1.166	-0.724	-0.098
16.85	-0.378	-1.01	-1.41	-0.746	0.165
16.86	-0.461	-1.17	-1.559	-0.743	0.389
16.87	-0.526	-1.29	-1.643	-0.703	0.551
16.88	-0.57	-1.343	-1.693	-0.658	0.691
16.89	-0.583	-1.332	-1.696	-0.602	0.798
16.9	-0.55	-1.281	-1.627	-0.534	0.869
16.91	-0.511	-1.172	-1.481	-0.453	0.86
16.92	-0.481	-1.015	-1.248	-0.379	0.735
16.93	-0.428	-0.835	-0.951	-0.297	0.489
16.94	-0.337	-0.597	-0.643	-0.226	0.205
16.95	-0.197	-0.301	-0.338	-0.173	-0.065
16.96	-0.001	0.018	-0.028	-0.152	-0.302
16.97	0.202	0.366	0.29	-0.136	-0.516
16.98	0.354	0.703	0.615	-0.106	-0.693
16.99	0.464	0.973	0.936	-0.013	-0.836
17	0.526	1.155	1.224	0.15	-0.911
17.01	0.547	1.252	1.461	0.37	-0.898
17.02	0.551	1.271	1.64	0.601	-0.795
17.03	0.548	1.25	1.742	0.811	-0.612
17.04	0.508	1.217	1.775	0.977	-0.35
17.05	0.444	1.126	1.738	1.105	-0.046
17.06	0.361	0.982	1.605	1.186	0.259
17.07	0.255	0.781	1.394	1.203	0.547
17.08	0.152	0.528	1.123	1.157	0.778
17.09	0.06	0.272	0.799	1.028	0.921
17.1	-0.04	0.039	0.448	0.826	0.975
17.11	-0.142	-0.198	0.094	0.591	0.94
17.12	-0.231	-0.434	-0.268	0.339	0.825
17.13	-0.315	-0.641	-0.618	0.051	0.645
17.14	-0.38	-0.814	-0.927	-0.265	0.429
17.15	-0.412	-0.931	-1.197	-0.601	0.182
17.16	-0.419	-0.978	-1.423	-0.935	-0.059
17.17	-0.389	-0.991	-1.611	-1.226	-0.257
17.18	-0.336	-0.981	-1.758	-1.448	-0.426
17.19	-0.277	-0.942	-1.829	-1.586	-0.588
17.2	-0.232	-0.887	-1.792	-1.634	-0.72
17.21	-0.193	-0.798	-1.653	-1.602	-0.829
17.22	-0.167	-0.652	-1.429	-1.517	-0.894
17.23	-0.118	-0.484	-1.166	-1.355	-0.894
17.24	-0.056	-0.319	-0.894	-1.118	-0.821
17.25	-0.002	-0.165	-0.617	-0.831	-0.719
17.26	0.036	-0.043	-0.309	-0.506	-0.581
17.27	0.074	0.084	0.027	-0.174	-0.41
17.28	0.116	0.265	0.369	0.123	-0.208
17.29	0.182	0.473	0.696	0.405	0.01
17.3	0.255	0.671	0.995	0.683	0.233
17.31	0.297	0.824	1.235	0.93	0.41
17.32	0.298	0.881	1.4	1.119	0.529
17.33	0.264	0.839	1.465	1.208	0.585
17.34	0.204	0.76	1.411	1.18	0.582
17.35	0.181	0.66	1.261	1.07	0.517
17.36	0.187	0.561	1.041	0.915	0.404
17.37	0.175	0.475	0.809	0.701	0.237
17.38	0.13	0.379	0.587	0.452	0.01
17.39	0.077	0.244	0.371	0.177	-0.211
17.4	0.021	0.098	0.136	-0.094	-0.41
17.41	-0.013	-0.045	-0.119	-0.331	-0.536
17.42	-0.013	-0.176	-0.381	-0.515	-0.585
17.43	-0.02	-0.268	-0.621	-0.649	-0.564
17.44	-0.071	-0.362	-0.785	-0.702	-0.47
17.45	-0.151	-0.49	-0.854	-0.658	-0.307
17.46	-0.227	-0.616	-0.86	-0.522	-0.084
17.47	-0.293	-0.712	-0.83	-0.321	0.205
17.48	-0.315	-0.756	-0.761	-0.072	0.517
17.49	-0.331	-0.718	-0.659	0.17	0.843
17.5	-0.332	-0.622	-0.502	0.39	1.112
17.51	-0.322	-0.522	-0.276	0.604	1.288
17.52	-0.276	-0.392	-0.013	0.769	1.306
17.53	-0.197	-0.205	0.255	0.872	1.2
17.54	-0.089	0.01	0.508	0.891	0.993
17.55	0.007	0.244	0.69	0.821	0.707
17.56	0.091	0.435	0.794	0.646	0.345
17.57	0.167	0.558	0.821	0.405	-0.046
17.58	0.252	0.641	0.757	0.174	-0.452
17.59	0.352	0.72	0.686	-0.045	-0.824
17.6	0.412	0.782	0.648	-0.239	-1.132
17.61	0.432	0.833	0.647	-0.413	-1.36
17.62	0.417	0.853	0.657	-0.515	-1.475
17.63	0.413	0.808	0.602	-0.547	-1.441
17.64	0.399	0.69	0.452	-0.506	-1.248
17.65	0.339	0.512	0.264	-0.393	-0.968
17.66	0.224	0.267	0.112	-0.237	-0.612
17.67	0.054	0.027	-0.007	-0.077	-0.193
17.68	-0.11	-0.183	-0.105	0.101	0.249
17.69	-0.198	-0.373	-0.21	0.29	0.668
17.7	-0.26	-0.553	-0.362	0.431	1.027
17.71	-0.349	-0.711	-0.505	0.478	1.274
17.72	-0.429	-0.841	-0.639	0.444	1.384
17.73	-0.468	-0.915	-0.764	0.346	1.386
17.74	-0.468	-0.894	-0.851	0.199	1.277
17.75	-0.429	-0.828	-0.863	0.051	1.053
17.76	-0.354	-0.738	-0.827	-0.078	0.718
17.77	-0.303	-0.612	-0.734	-0.231	0.327
17.78	-0.235	-0.469	-0.625	-0.42	-0.098
17.79	-0.141	-0.31	-0.539	-0.606	-0.495
17.8	-0.035	-0.132	-0.48	-0.768	-0.824
17.81	0.063	0.031	-0.425	-0.892	-1.066
17.82	0.165	0.167	-0.331	-0.943	-1.214
17.83	0.246	0.306	-0.186	-0.908	-1.267
17.84	0.291	0.436	0.012	-0.783	-1.242
17.85	0.336	0.548	0.253	-0.568	-1.124
17.86	0.372	0.648	0.491	-0.286	-0.938
17.87	0.362	0.698	0.705	0.046	-0.67
17.88	0.315	0.673	0.869	0.371	-0.336
17.89	0.231	0.599	0.968	0.664	0.034
17.9	0.125	0.48	1.008	0.906	0.416
17.91	0.051	0.351	0.964	1.097	0.76
17.92	0.009	0.238	0.852	1.2	1.037
17.93	-0.023	0.157	0.714	1.204	1.215
17.94	-0.053	0.067	0.57	1.127	1.288
17.95	-0.095	-0.018	0.416	0.966	1.251
17.96	-0.141	-0.108	0.256	0.756	1.105
17.97	-0.172	-0.22	0.082	0.533	0.828
17.98	-0.197	-0.288	-0.112	0.278	0.488
17.99	-0.185	-0.293	-0.288	-0.037	0.126
18	-0.144	-0.286	-0.451	-0.379	-0.212
18.01	-0.092	-0.275	-0.609	-0.707	-0.501
18.02	-0.059	-0.287	-0.777	-0.99	-0.761
18.03	-0.047	-0.346	-0.938	-1.195	-0.982
18.04	-0.045	-0.388	-1.045	-1.326	-1.121
18.05	-0.045	-0.367	-1.077	-1.371	-1.145
18.06	-0.015	-0.316	-1.032	-1.312	-1.059
18.07	0.013	-0.26	-0.912	-1.163	-0.903
18.08	0	-0.226	-0.726	-0.92	-0.704
18.09	-0.035	-0.235	-0.508	-0.588	-0.453
18.1	-0.057	-0.23	-0.3	-0.226	-0.161
18.11	-0.087	-0.168	-0.083	0.118	0.163
18.12	-0.08	-0.084	0.146	0.42	0.477
18.13	-0.064	0.014	0.34	0.662	0.743
18.14	-0.034	0.109	0.513	0.835	0.932
18.15	-0.02	0.161	0.64	0.956	1.011
18.16	0.011	0.194	0.711	1.036	0.986
18.17	0.004	0.25	0.753	1.02	0.908
18.18	0.011	0.309	0.78	0.936	0.748
18.19	0.05	0.345	0.775	0.831	0.551
18.2	0.081	0.392	0.755	0.695	0.29
18.21	0.126	0.427	0.736	0.502	0.007
18.22	0.158	0.458	0.673	0.289	-0.261
18.23	0.194	0.5	0.584	0.051	-0.497
18.24	0.225	0.496	0.416	-0.198	-0.675
18.25	0.24	0.432	0.197	-0.42	-0.792
18.26	0.212	0.298	-0.018	-0.585	-0.874
18.27	0.162	0.138	-0.238	-0.704	-0.887
18.28	0.106	-0.019	-0.421	-0.768	-0.843
18.29	0.035	-0.149	-0.537	-0.766	-0.743
18.3	-0.02	-0.271	-0.608	-0.701	-0.571
18.31	-0.08	-0.372	-0.647	-0.578	-0.34
18.32	-0.135	-0.453	-0.667	-0.427	-0.027
18.33	-0.199	-0.531	-0.676	-0.243	0.296
18.34	-0.253	-0.604	-0.658	-0.062	0.598
18.35	-0.315	-0.639	-0.599	0.098	0.826
18.36	-0.346	-0.645	-0.537	0.232	0.928
18.37	-0.333	-0.599	-0.451	0.317	0.94
18.38	-0.284	-0.503	-0.338	0.333	0.886
18.39	-0.239	-0.388	-0.245	0.299	0.773
18.4	-0.187	-0.271	-0.156	0.245	0.616
18.41	-0.148	-0.17	-0.061	0.181	0.385
18.42	-0.095	-0.068	0.029	0.118	0.118
18.43	-0.002	0.077	0.136	0.043	-0.159
18.44	0.118	0.285	0.27	-0.053	-0.429
18.45	0.236	0.492	0.421	-0.174	-0.651
18.46	0.328	0.658	0.537	-0.262	-0.837
18.47	0.378	0.733	0.592	-0.286	-0.965
18.48	0.373	0.703	0.589	-0.251	-1.026
18.49	0.334	0.628	0.552	-0.193	-0.962
18.5	0.296	0.548	0.495	-0.124	-0.789
18.51	0.264	0.462	0.444	-0.03	-0.537
18.52	0.204	0.358	0.406	0.087	-0.254
18.53	0.137	0.245	0.373	0.23	0.021
18.54	0.062	0.122	0.328	0.383	0.276
18.55	-0.008	0.011	0.263	0.52	0.523
18.56	-0.088	-0.087	0.186	0.584	0.737
18.57	-0.143	-0.19	0.096	0.569	0.891
18.58	-0.212	-0.298	-0.031	0.498	0.945
18.59	-0.264	-0.405	-0.197	0.393	0.915
18.6	-0.295	-0.501	-0.364	0.252	0.785
18.61	-0.294	-0.561	-0.512	0.092	0.598
18.62	-0.283	-0.555	-0.612	-0.103	0.365
18.63	-0.253	-0.522	-0.668	-0.334	0.101
18.64	-0.195	-0.451	-0.691	-0.552	-0.169
18.65	-0.131	-0.355	-0.706	-0.718	-0.423
18.66	-0.056	-0.243	-0.697	-0.841	-0.639
18.67	0.005	-0.143	-0.637	-0.9	-0.798
18.68	0.056	-0.067	-0.531	-0.886	-0.894
18.69	0.082	-0.001	-0.394	-0.794	-0.896
18.7	0.107	0.056	-0.243	-0.636	-0.789
18.71	0.113	0.104	-0.083	-0.42	-0.611
18.72	0.113	0.145	0.077	-0.167	-0.397
18.73	0.119	0.192	0.225	0.098	-0.164
18.74	0.113	0.24	0.368	0.327	0.068
18.75	0.103	0.28	0.534	0.515	0.292
18.76	0.114	0.317	0.669	0.688	0.495
18.77	0.107	0.345	0.76	0.852	0.663
18.78	0.085	0.335	0.83	0.975	0.772
18.79	0.054	0.32	0.86	1.03	0.824
18.8	0.017	0.306	0.833	1.014	0.792
18.81	-0.002	0.286	0.777	0.901	0.694
18.82	-0.006	0.26	0.667	0.723	0.554
18.83	0.022	0.213	0.497	0.514	0.357
18.84	0.038	0.148	0.3	0.277	0.123
18.85	0.029	0.072	0.088	0.012	-0.134
18.86	0.002	0.003	-0.119	-0.273	-0.392
18.87	0.009	-0.045	-0.294	-0.528	-0.614
18.88	0.038	-0.069	-0.443	-0.735	-0.761
18.89	0.053	-0.087	-0.559	-0.887	-0.812
18.9	0.034	-0.142	-0.622	-0.946	-0.798
18.91	-0.002	-0.23	-0.671	-0.904	-0.722
18.92	-0.064	-0.328	-0.734	-0.817	-0.594
18.93	-0.113	-0.417	-0.763	-0.701	-0.417
18.94	-0.15	-0.472	-0.753	-0.57	-0.231
18.95	-0.152	-0.47	-0.725	-0.449	-0.032
18.96	-0.146	-0.437	-0.658	-0.334	0.143
18.97	-0.145	-0.401	-0.539	-0.195	0.302
18.98	-0.162	-0.368	-0.413	-0.012	0.441
18.99	-0.167	-0.34	-0.265	0.196	0.569
19	-0.175	-0.297	-0.088	0.397	0.679
19.01	-0.161	-0.204	0.096	0.566	0.747
19.02	-0.118	-0.059	0.303	0.676	0.743
19.03	-0.056	0.116	0.512	0.725	0.667
19.04	0.009	0.293	0.669	0.708	0.52
19.05	0.089	0.431	0.769	0.645	0.331
19.06	0.17	0.514	0.802	0.537	0.12
19.07	0.217	0.553	0.759	0.401	-0.098
19.08	0.242	0.558	0.683	0.25	-0.304
19.09	0.254	0.545	0.609	0.107	-0.486
19.1	0.258	0.529	0.529	-0.022	-0.636
19.11	0.259	0.517	0.473	-0.113	-0.727
19.12	0.273	0.489	0.435	-0.165	-0.762
19.13	0.259	0.454	0.384	-0.204	-0.738
19.14	0.237	0.388	0.299	-0.228	-0.626
19.15	0.181	0.268	0.156	-0.226	-0.452
19.16	0.083	0.094	-0.032	-0.212	-0.255
19.17	-0.029	-0.12	-0.223	-0.185	-0.043
19.18	-0.124	-0.332	-0.411	-0.137	0.17
19.19	-0.194	-0.495	-0.563	-0.086	0.374
19.2	-0.262	-0.602	-0.652	-0.04	0.55
19.21	-0.309	-0.669	-0.675	0.012	0.687
19.22	-0.356	-0.689	-0.662	0.051	0.744
19.23	-0.378	-0.684	-0.626	0.075	0.735
19.24	-0.363	-0.653	-0.584	0.059	0.658
19.25	-0.314	-0.565	-0.55	-0.027	0.529
19.26	-0.239	-0.427	-0.507	-0.145	0.356
19.27	-0.143	-0.28	-0.437	-0.271	0.148
19.28	-0.061	-0.146	-0.367	-0.374	-0.087
19.29	0.022	-0.031	-0.293	-0.415	-0.338
19.3	0.071	0.047	-0.186	-0.416	-0.538
19.31	0.095	0.118	-0.066	-0.402	-0.67
19.32	0.121	0.192	0.056	-0.349	-0.733
19.33	0.179	0.284	0.196	-0.256	-0.699
19.34	0.234	0.405	0.338	-0.133	-0.597
19.35	0.289	0.522	0.484	0.021	-0.452
19.36	0.304	0.598	0.644	0.186	-0.288
19.37	0.291	0.617	0.779	0.357	-0.128
19.38	0.243	0.584	0.851	0.51	0.027
19.39	0.184	0.503	0.869	0.63	0.184
19.4	0.125	0.412	0.807	0.701	0.344
19.41	0.07	0.31	0.675	0.731	0.472
19.42	0.005	0.17	0.517	0.716	0.559
19.43	-0.063	0.014	0.361	0.66	0.583
19.44	-0.125	-0.12	0.213	0.551	0.561
19.45	-0.153	-0.2	0.069	0.396	0.509
19.46	-0.15	-0.22	-0.082	0.2	0.415
19.47	-0.13	-0.22	-0.241	-0.008	0.272
19.48	-0.118	-0.23	-0.391	-0.213	0.098
19.49	-0.123	-0.272	-0.502	-0.409	-0.099
19.5	-0.137	-0.332	-0.599	-0.585	-0.285
19.51	-0.123	-0.383	-0.695	-0.703	-0.438
19.52	-0.112	-0.408	-0.776	-0.77	-0.539
19.53	-0.113	-0.413	-0.817	-0.809	-0.58
19.54	-0.117	-0.396	-0.812	-0.811	-0.563
19.55	-0.096	-0.364	-0.77	-0.766	-0.506
19.56	-0.049	-0.303	-0.693	-0.678	-0.406
19.57	-0.005	-0.234	-0.565	-0.554	-0.279
19.58	0.003	-0.158	-0.386	-0.401	-0.152
19.59	0.004	-0.081	-0.196	-0.228	-0.04
19.6	0.016	-0.003	-0.042	-0.024	0.064
19.61	0.023	0.059	0.121	0.189	0.194
19.62	0.02	0.117	0.291	0.39	0.321
19.63	0.02	0.156	0.446	0.562	0.411
19.64	0.003	0.195	0.584	0.681	0.467
19.65	-0.003	0.241	0.669	0.755	0.491
19.66	0.028	0.29	0.72	0.78	0.476
19.67	0.059	0.337	0.74	0.753	0.457
19.68	0.097	0.376	0.721	0.668	0.359
19.69	0.125	0.399	0.671	0.55	0.221
19.7	0.14	0.405	0.619	0.407	0.062
19.71	0.129	0.4	0.547	0.249	-0.088
19.72	0.125	0.374	0.451	0.101	-0.215
19.73	0.142	0.316	0.316	-0.031	-0.318
19.74	0.131	0.215	0.139	-0.146	-0.393
19.75	0.093	0.082	-0.05	-0.278	-0.456
19.76	0.036	-0.057	-0.233	-0.432	-0.509
19.77	-0.019	-0.159	-0.415	-0.59	-0.528
19.78	-0.032	-0.233	-0.592	-0.717	-0.536
19.79	-0.026	-0.293	-0.746	-0.784	-0.509
19.8	-0.046	-0.364	-0.839	-0.806	-0.45
19.81	-0.122	-0.442	-0.862	-0.764	-0.365
19.82	-0.195	-0.534	-0.843	-0.661	-0.231
19.83	-0.242	-0.588	-0.804	-0.492	-0.064
19.84	-0.258	-0.593	-0.747	-0.297	0.141
19.85	-0.259	-0.566	-0.645	-0.105	0.34
19.86	-0.262	-0.517	-0.503	0.054	0.506
19.87	-0.262	-0.441	-0.327	0.201	0.62
19.88	-0.222	-0.335	-0.135	0.349	0.705
19.89	-0.163	-0.184	0.056	0.488	0.753
19.9	-0.08	-0.016	0.258	0.623	0.769
19.91	-0.016	0.141	0.468	0.737	0.725
19.92	0.029	0.265	0.659	0.813	0.638
19.93	0.068	0.372	0.814	0.837	0.495
19.94	0.112	0.46	0.94	0.795	0.314
19.95	0.182	0.562	0.997	0.711	0.115
19.96	0.267	0.663	0.979	0.588	-0.115
19.97	0.351	0.746	0.941	0.409	-0.357
19.98	0.395	0.796	0.892	0.206	-0.579
[truncated: 9,681 more rows]
