# Supplementary material for: Finite Element Model Updating of Steel Arch Bridge Based on First-Order Mode Test Data
Source: Hindawi journal article supplement (doi:10.1155/2023/9326195), 2023-04-15
Supplement: f1 [file 9326195.f1.zip › updating (1).txt]

close all
clear
clc
load k0
load m0
load model

%%%修正前刚度矩阵和质量矩阵
k0([1,2,3,37,38,39],:)=0;%节点1、11刚度矩阵画0置1
k0(:,[1,2,3,37,38,39])=0;
k0(1,1)=1;
k0(2,2)=1;
k0(3,3)=1;
k0(37,37)=1;
k0(38,38)=1;
k0(39,39)=1;
m0([1,2,3,37,38,39],:)=0;%节点1、11质量矩阵画0置1
m0(:,[1,2,3,37,38,39])=0;
m0(1,1)=1;
m0(2,2)=1;
m0(3,3)=1;
m0(37,37)=1;
m0(38,38)=1;
m0(39,39)=1;


%%%理论
[V,lmd]=eig(k0,m0);  %计算特征向量和特征值
w2=diag(lmd);       %提取特征值      
fth=sqrt(w2)/2/pi; %提取固有频率  自振频率=sqrt（圆频率）/（2*π）
fth0=sort(fth);     %固有频率排序
s=V(:,7)/V(14,7); %理论振型shape 60×60阶

% p=V(:,7);O=V(:,8);Q=V(:,9);
%  plot(p,'k-o','Markersize',5,'MarkerFaceColor','k','LineWidth',1)
% set(gca,'xticklabel',[1 3 4 5 6 7 8 9 10 11 13])

%实测分析得到的竖向振型  
     
sm=[
0.242535446; 
0.653711426; 
1; 
0.608340284; 
0.06470392; 
-0.552652623; 
-0.916532094; 
-0.570590343; 
-0.246942617; 
    ];

% % 实测的振型60×60阶
for j=1:9
    i=j*3+5;
    s(i,:)=sm(j,:);
end
Sm=s*V(14,7);

fm=3.369;%实测频率值
lmdm=(2*pi*3.369)^2;%实测特征值 
%%%残值
R=(k0-lmdm*m0)*Sm;
%%%%%衰减系数
 alp=zeros(8,1);
    jd=[0;0;10;10;1.4;4;3;5;10;10];%精度系数
%杆件号1 2   3 4  5  6 7 8 9 10
for i=3:10
     j=i*3-1;
    alp(i)=(R(j,:)/(k0(j,:)*Sm*jd(i)));
end

%%%修正刚度矩阵
kx=k0;
for i=3:10
      kx=kx-alp(i)*model.k(i).stiff;
end

save kx
 
%%%修正后频率特征值和特征向量
[V2,lmdud]=eig(kx,m0);  %计算修正后的特征向量和特征值
wud2=diag(lmdud);       %提取修正后的特征值
fud=sqrt(wud2)/2/pi; %提取修正后固有频率
fud0=sort(fud);       %修正后固有频率排序

%%%振型对比
vth=-V([2,8,11,14,17,20,23,26,29,32,38],7)/V(14,7);%修正前振型
vud=-V2([2,8,11,14,17,20,23,26,29,32,38],7)/V2(14,7);%修正后振型
vm=[0; -0.242535446; -0.653711426; -1; -0.608340284; -0.06470392; 0.552652623; 0.916532094; 0.570590343; 0.246942617;  0];%%布置

%%%一阶实测振型图
figure;
% plot(vm)
 plot(vm,'k-o','Markersize',5,'MarkerFaceColor','k','LineWidth',1)
%  set(gca,'xtick',mu)
set(gca,'xticklabel',[1 3 4 5 6 7 8 9 10 11 13])


xlabel('Measuring points')
ylabel('Amplitude ratio')
set(gca,'Fontname','times new Roman');
ax2 = axes('Position' ,get(gca,'Position'),...
           'XAxisLocation','top',...
           'YAxisLocation',' right',...
            'Color', 'none',...
            'XColor','k','YColor','k'); 
set(ax2,'YTick', []);
set(ax2, 'XTick', []);

%%%修正前后和实测振型对比图
figure;
plot(vm,'g-*','LineWidth',1)
hold on
plot(vth,'k-o','Markersize',5,'MarkerFaceColor','k','LineWidth',1)
hold on
plot(vud,'m-square','Markersize',5,'MarkerFaceColor','m','LineWidth',1)
legend('measured','before updating','after updating')
xlabel('Measuring points')
ylabel('Amplitude ratio')
set(gca,'Fontname','times new Roman')
set(gca,'xticklabel',[1 3 4 5 6 7 8 9 10 11 13]);
%%数据保留三位小数
vth3=roundn(vth,-3);%修正前振型保留三位小数
vud3=roundn(vud,-3);%修正后振型保留三位小数
vm3=roundn(vm,-3);%实测数据保留三位小数
diff1=abs(vm3-vth3) ;%实测值与理论值的差值且保留后三位小数
diff2=abs(vm3-vud3);%实测值与修正值的差值且保留后三位小数
