# Supplementary material for: Finite Element Model Updating of Steel Arch Bridge Based on First-Order Mode Test Data
Source: Hindawi journal article supplement (doi:10.1155/2023/9326195), 2023-04-15
Supplement: f1 [file 9326195.f1.zip › wuxian.txt]

close all
clear
clc

fid = fopen('data.txt')
fgetl(fid)
a=fscanf(fid,'%f',[6 inf]);
fclose(fid)
figure;plot(a(2,:))
figure;plot(a(3,:))
figure;plot(a(4,:))


figure;plot(a(1,:),a(2,:),a(1,:),a(3,:),a(1,:),a(4,:))
dataN=2048;
n=1:dataN;
t=0:0.01:(dataN-1)*0.01;
pind=470;

%%
y=detrend(a(2,n+pind));
%%
figure;plot(t,y)

Fs = 100;            % Sampling frequency
T = 1/Fs;             % Sampling period
L = dataN;             % Length of signal

b=fft(y);%fourier
b(dataN/2+1:end)=[];
P = abs(b/L);
f = Fs*(0:(L/2-1))/L;
f=f.';
numb=20:90;
figure;area(f(numb),P(numb))
[pks n] = findpeaks(P(numb),'MinPeakDistance',5);

hold on
plot(f(n([ ])),P(n([ ])),'ro')
